# Supplementary figures and images for: NONMMUT140591.1 may serve as a ceRNA to regulate Gata5 in UT-B knockout-induced cardiac conduction block
Source: publisher site journal article supplement (doi:10.1515/biol-2021-0106), 2021-01-01

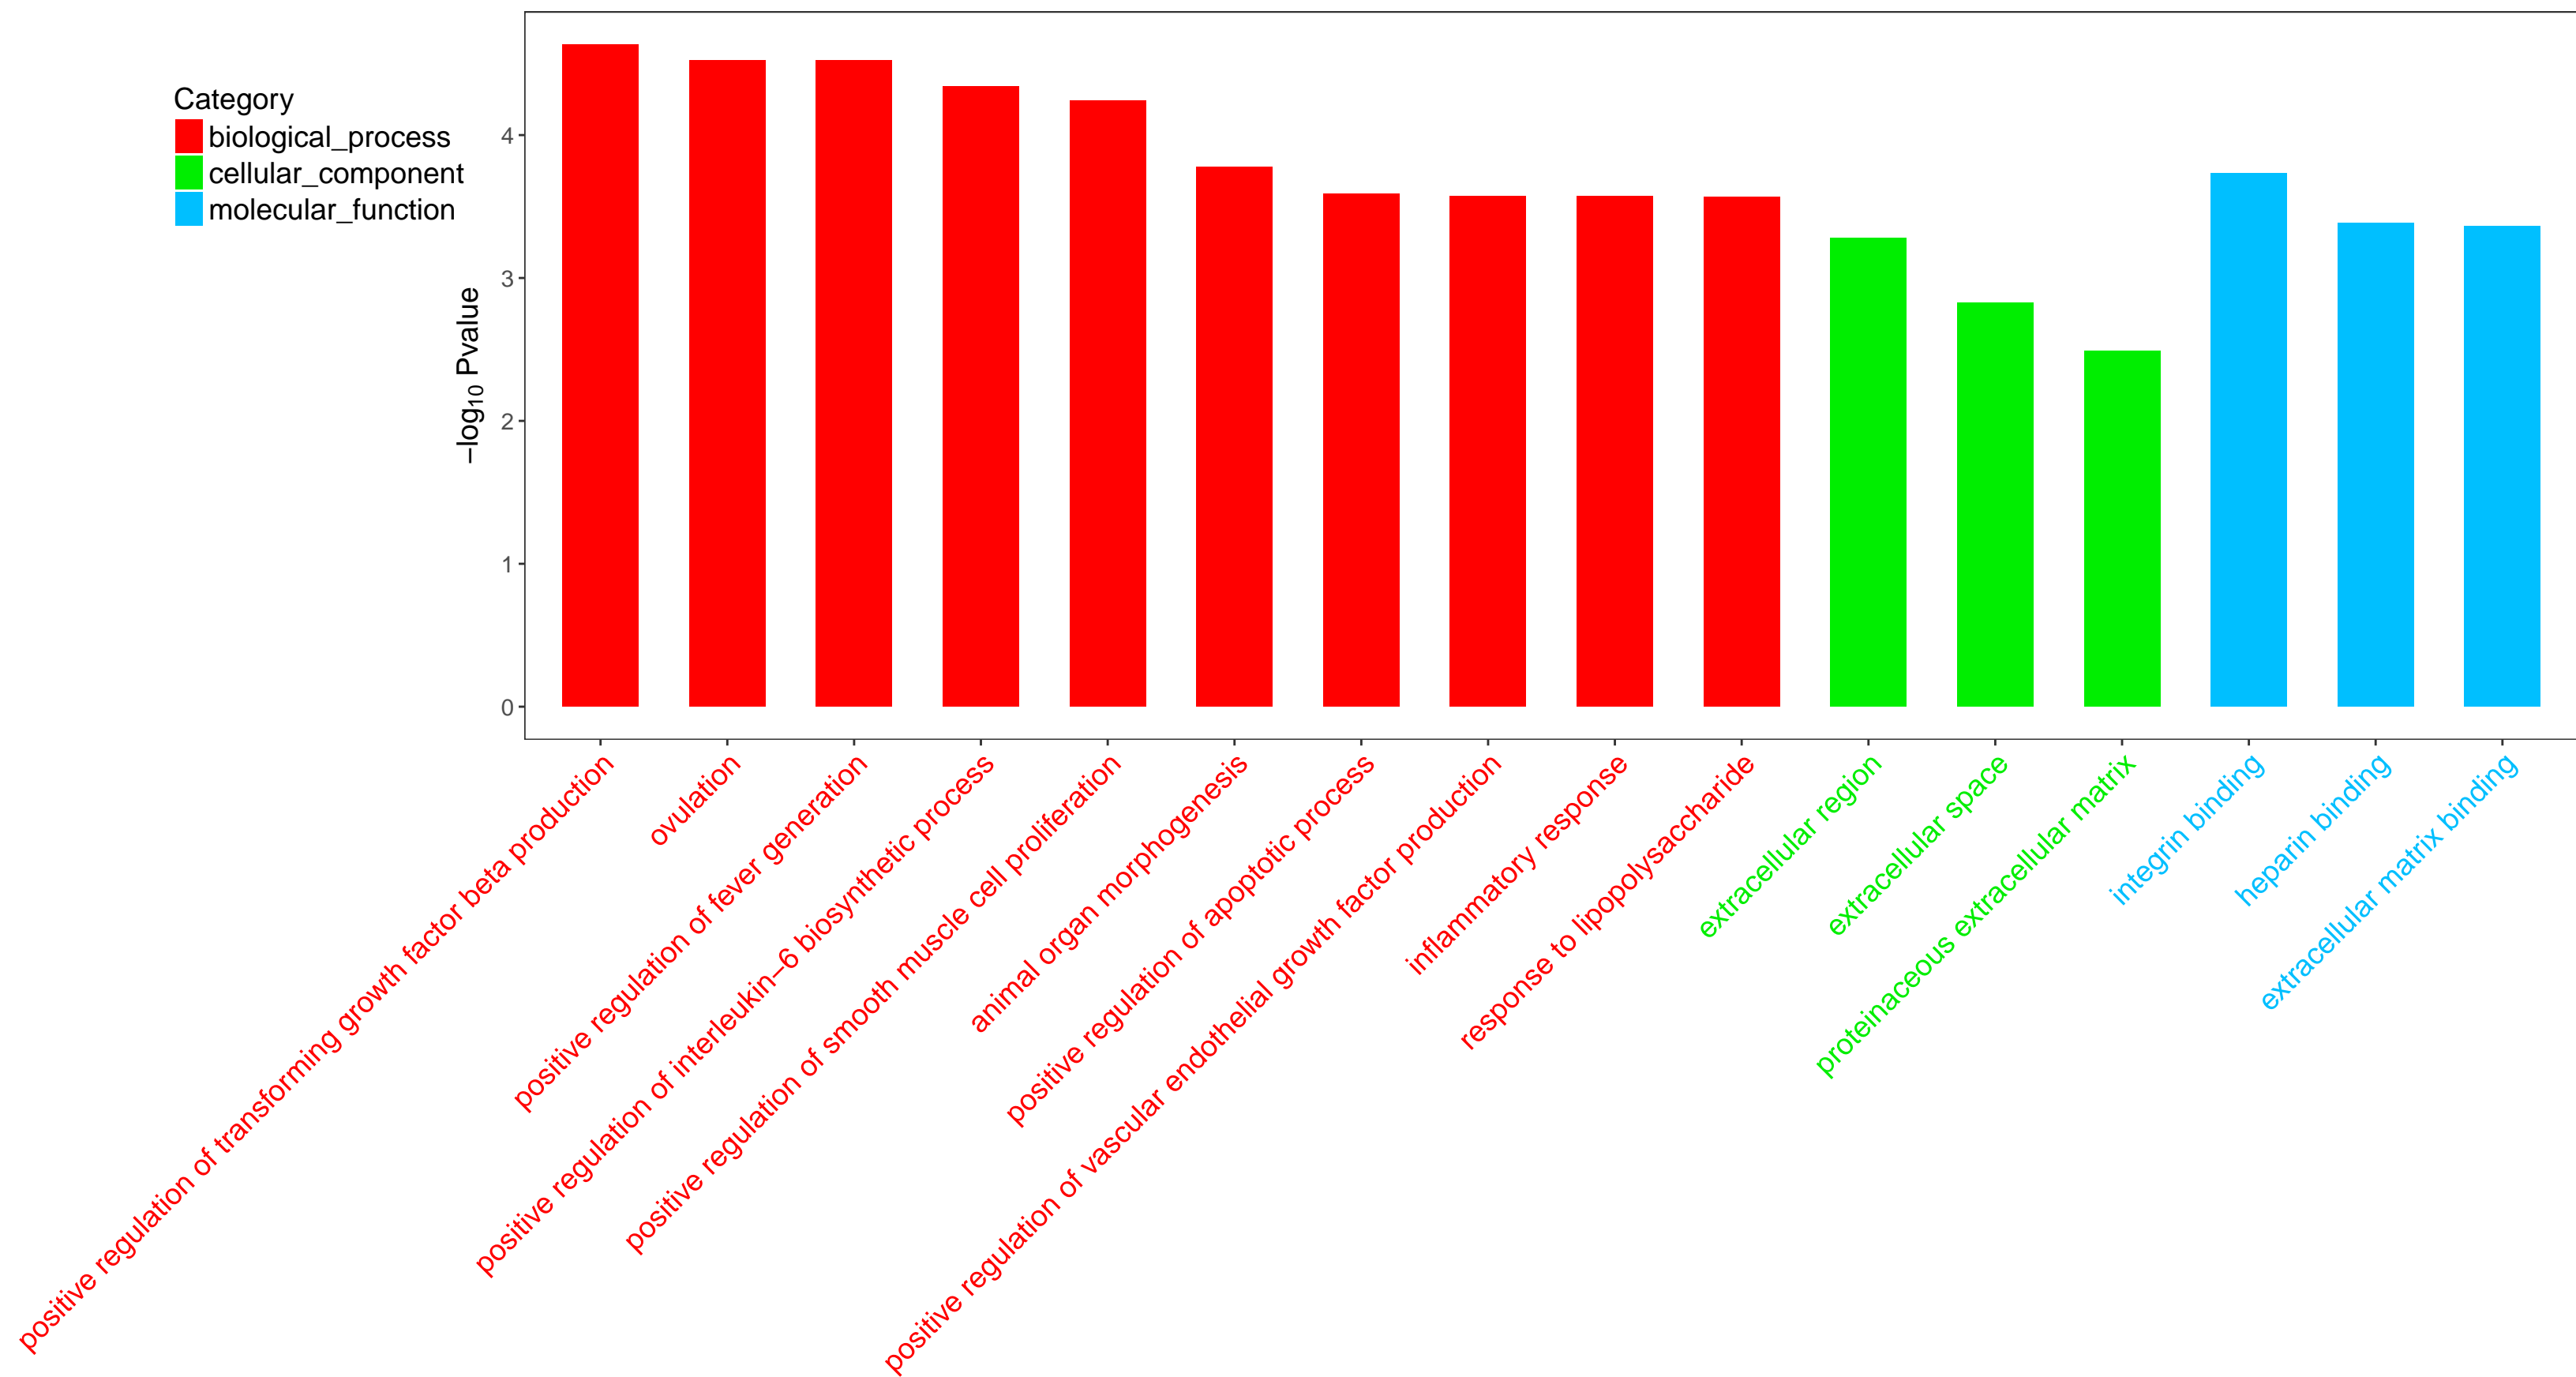

Supplement: Supplementary file 1 [file Supplementary_files.zip]

# KEGG Enrichment top 20

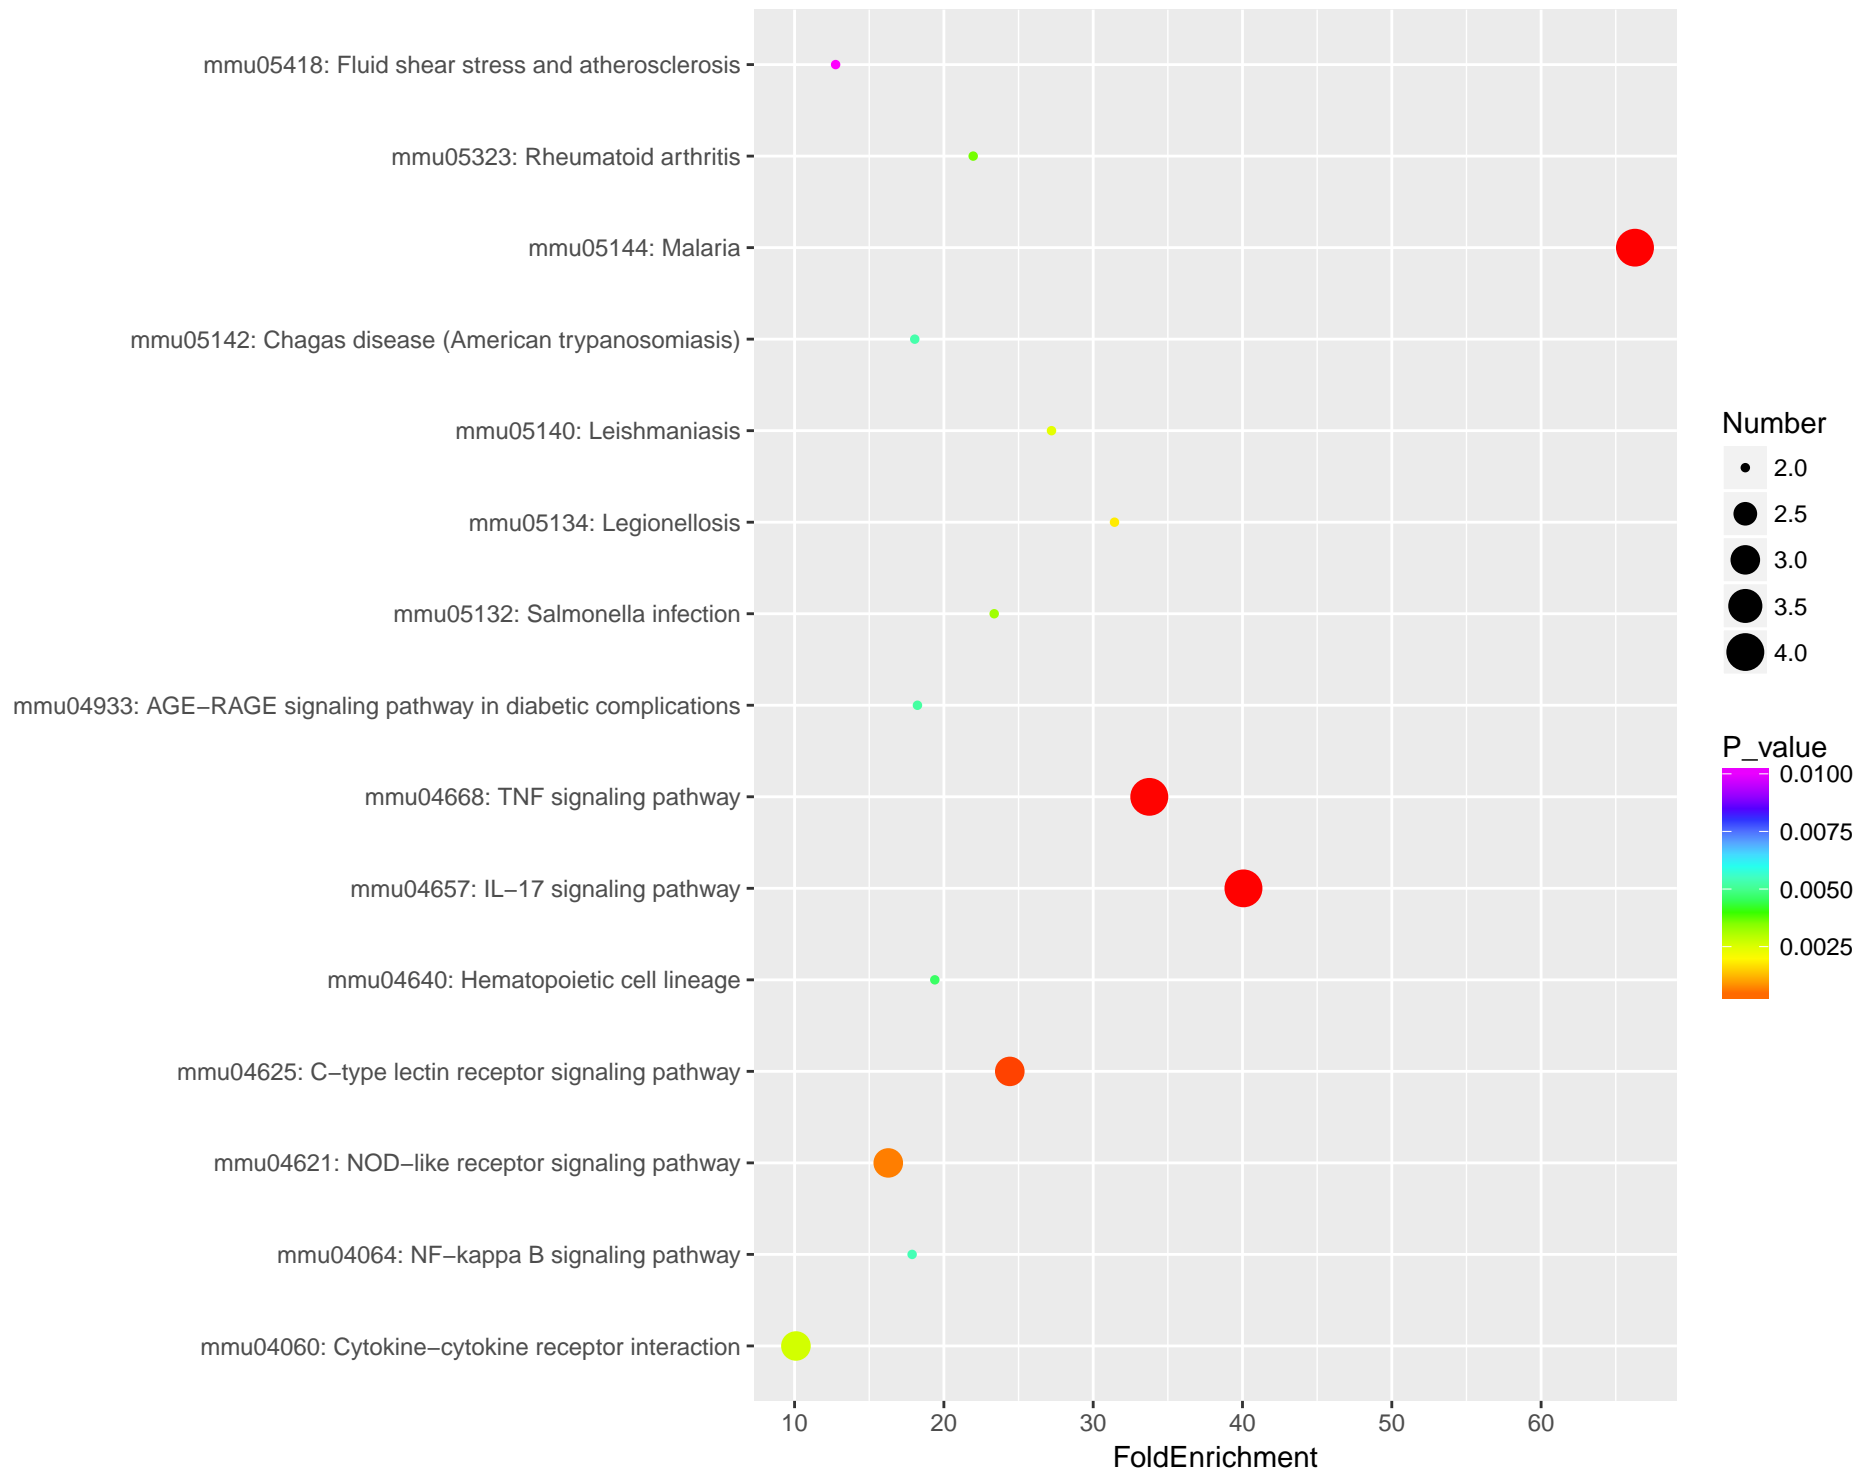

Supplement: Supplementary file 2 [file Supplementary_files.zip]

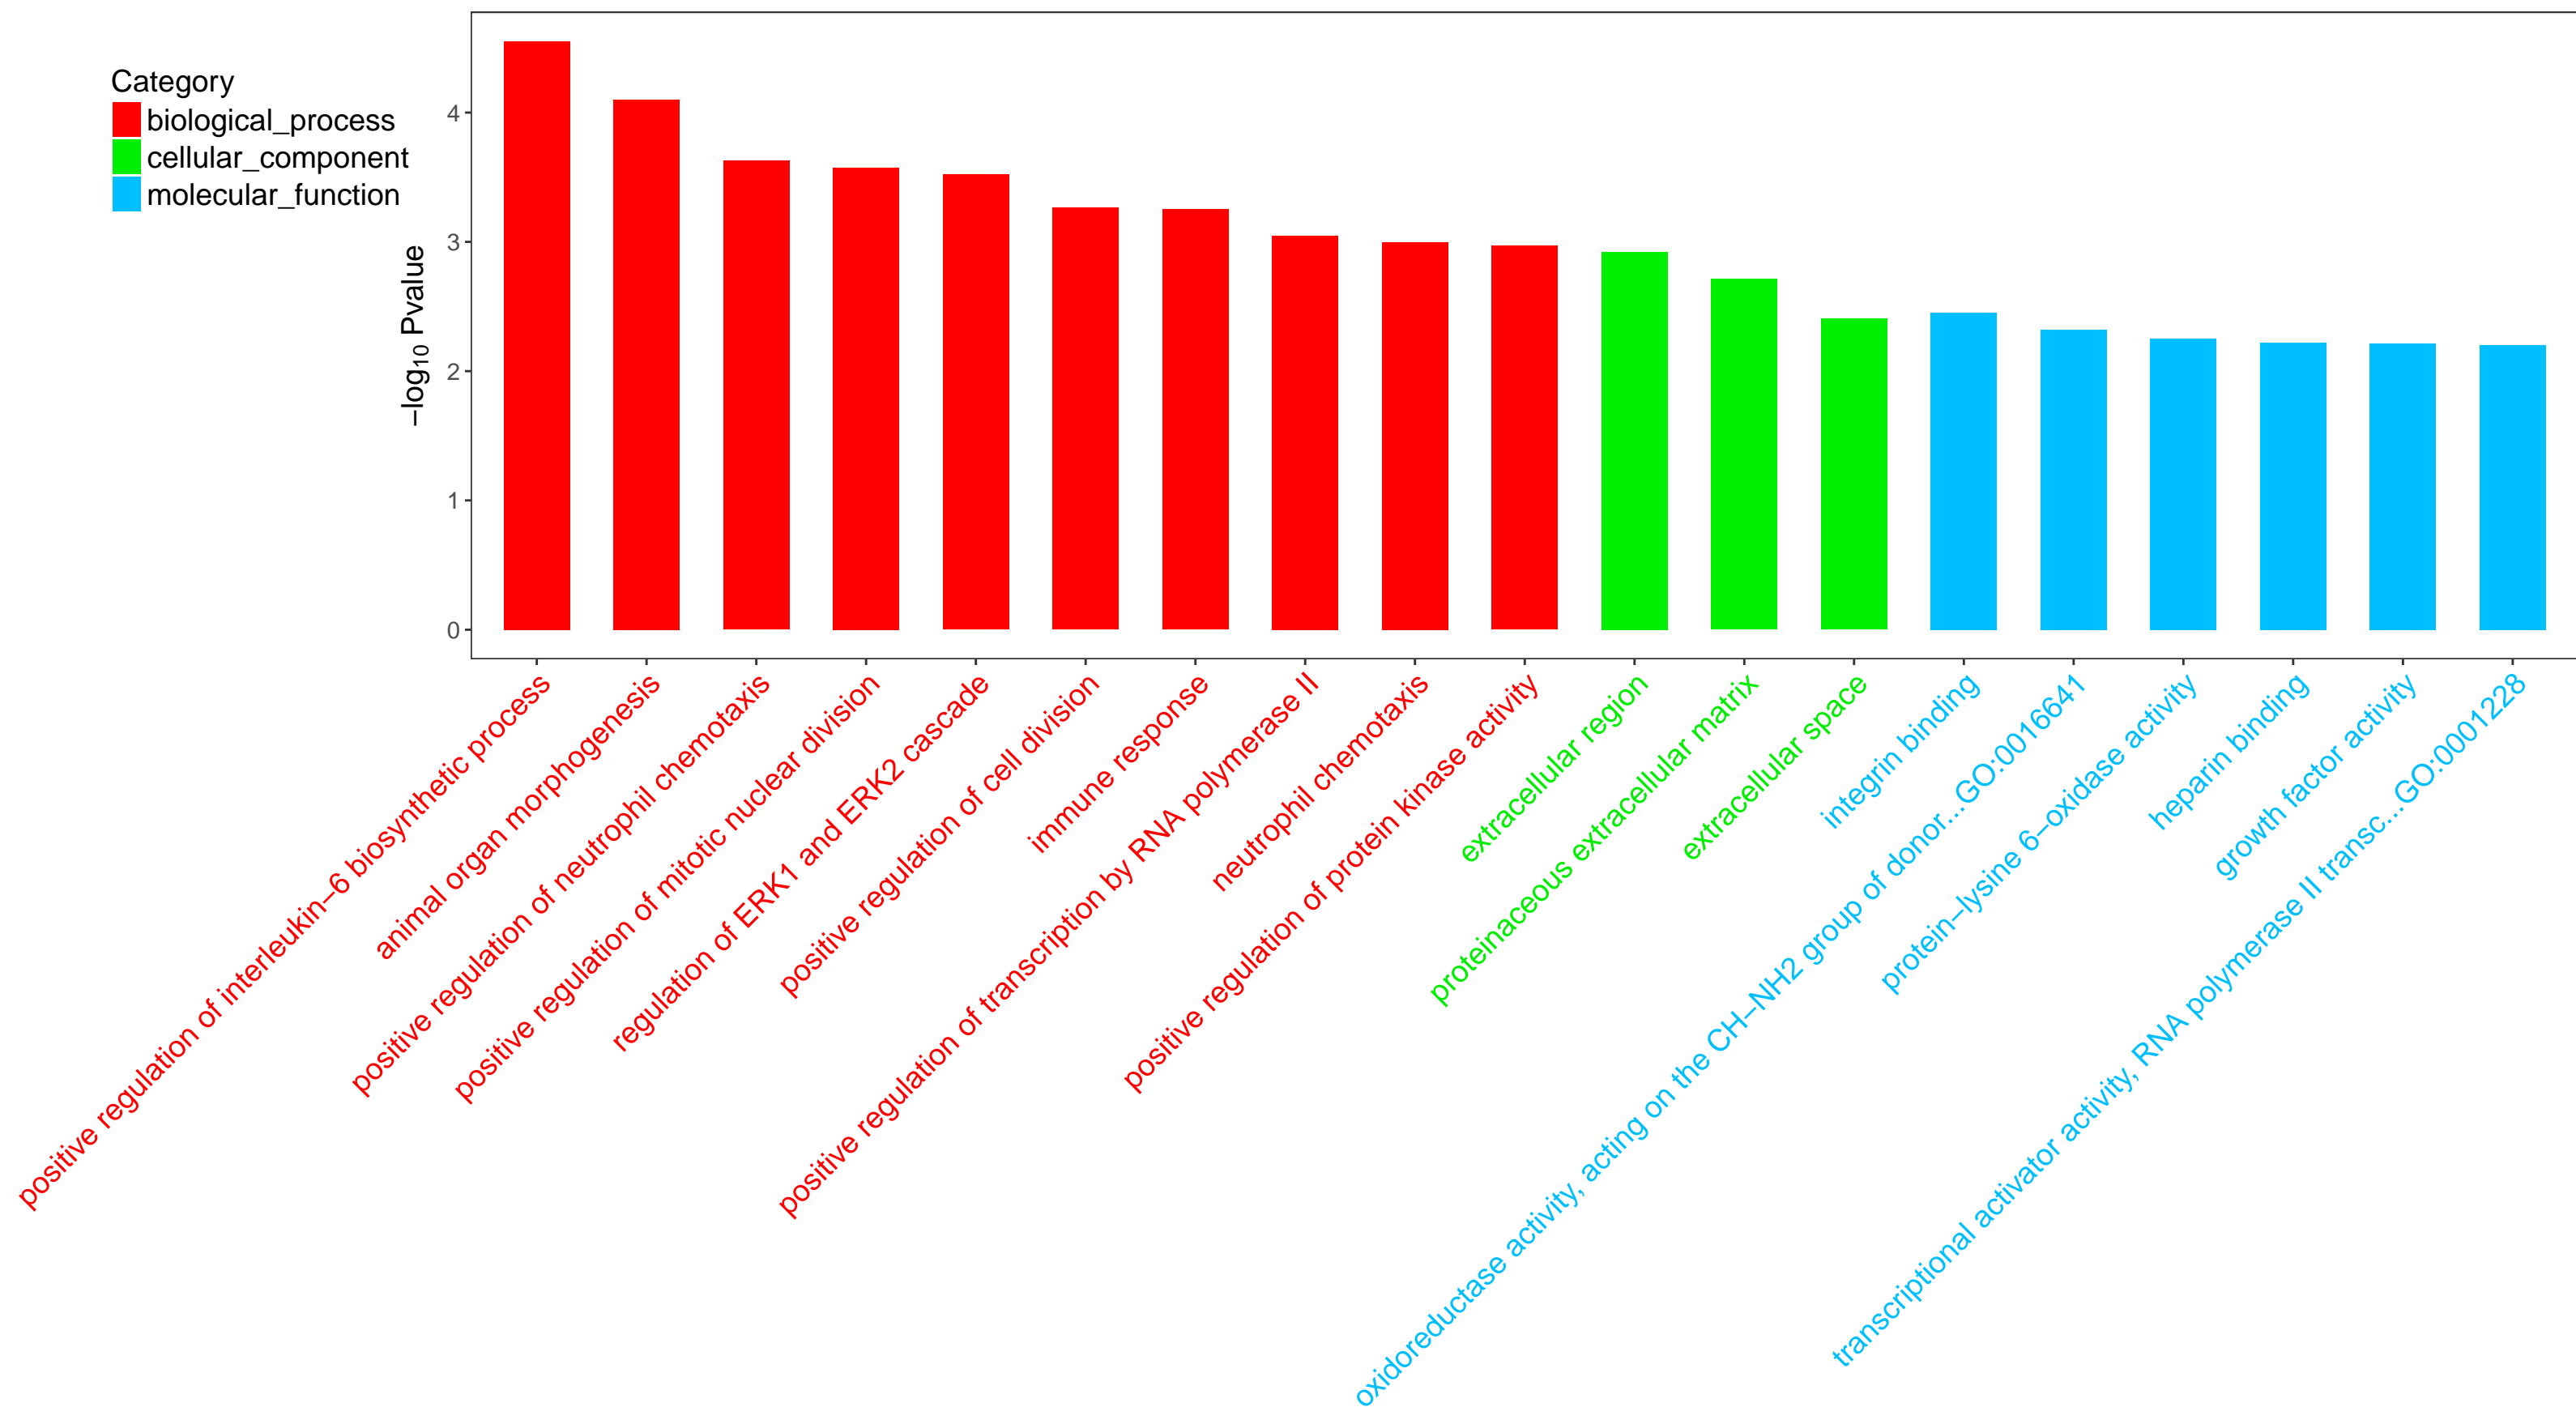

Supplement: Supplementary file 3 [file Supplementary_files.zip]

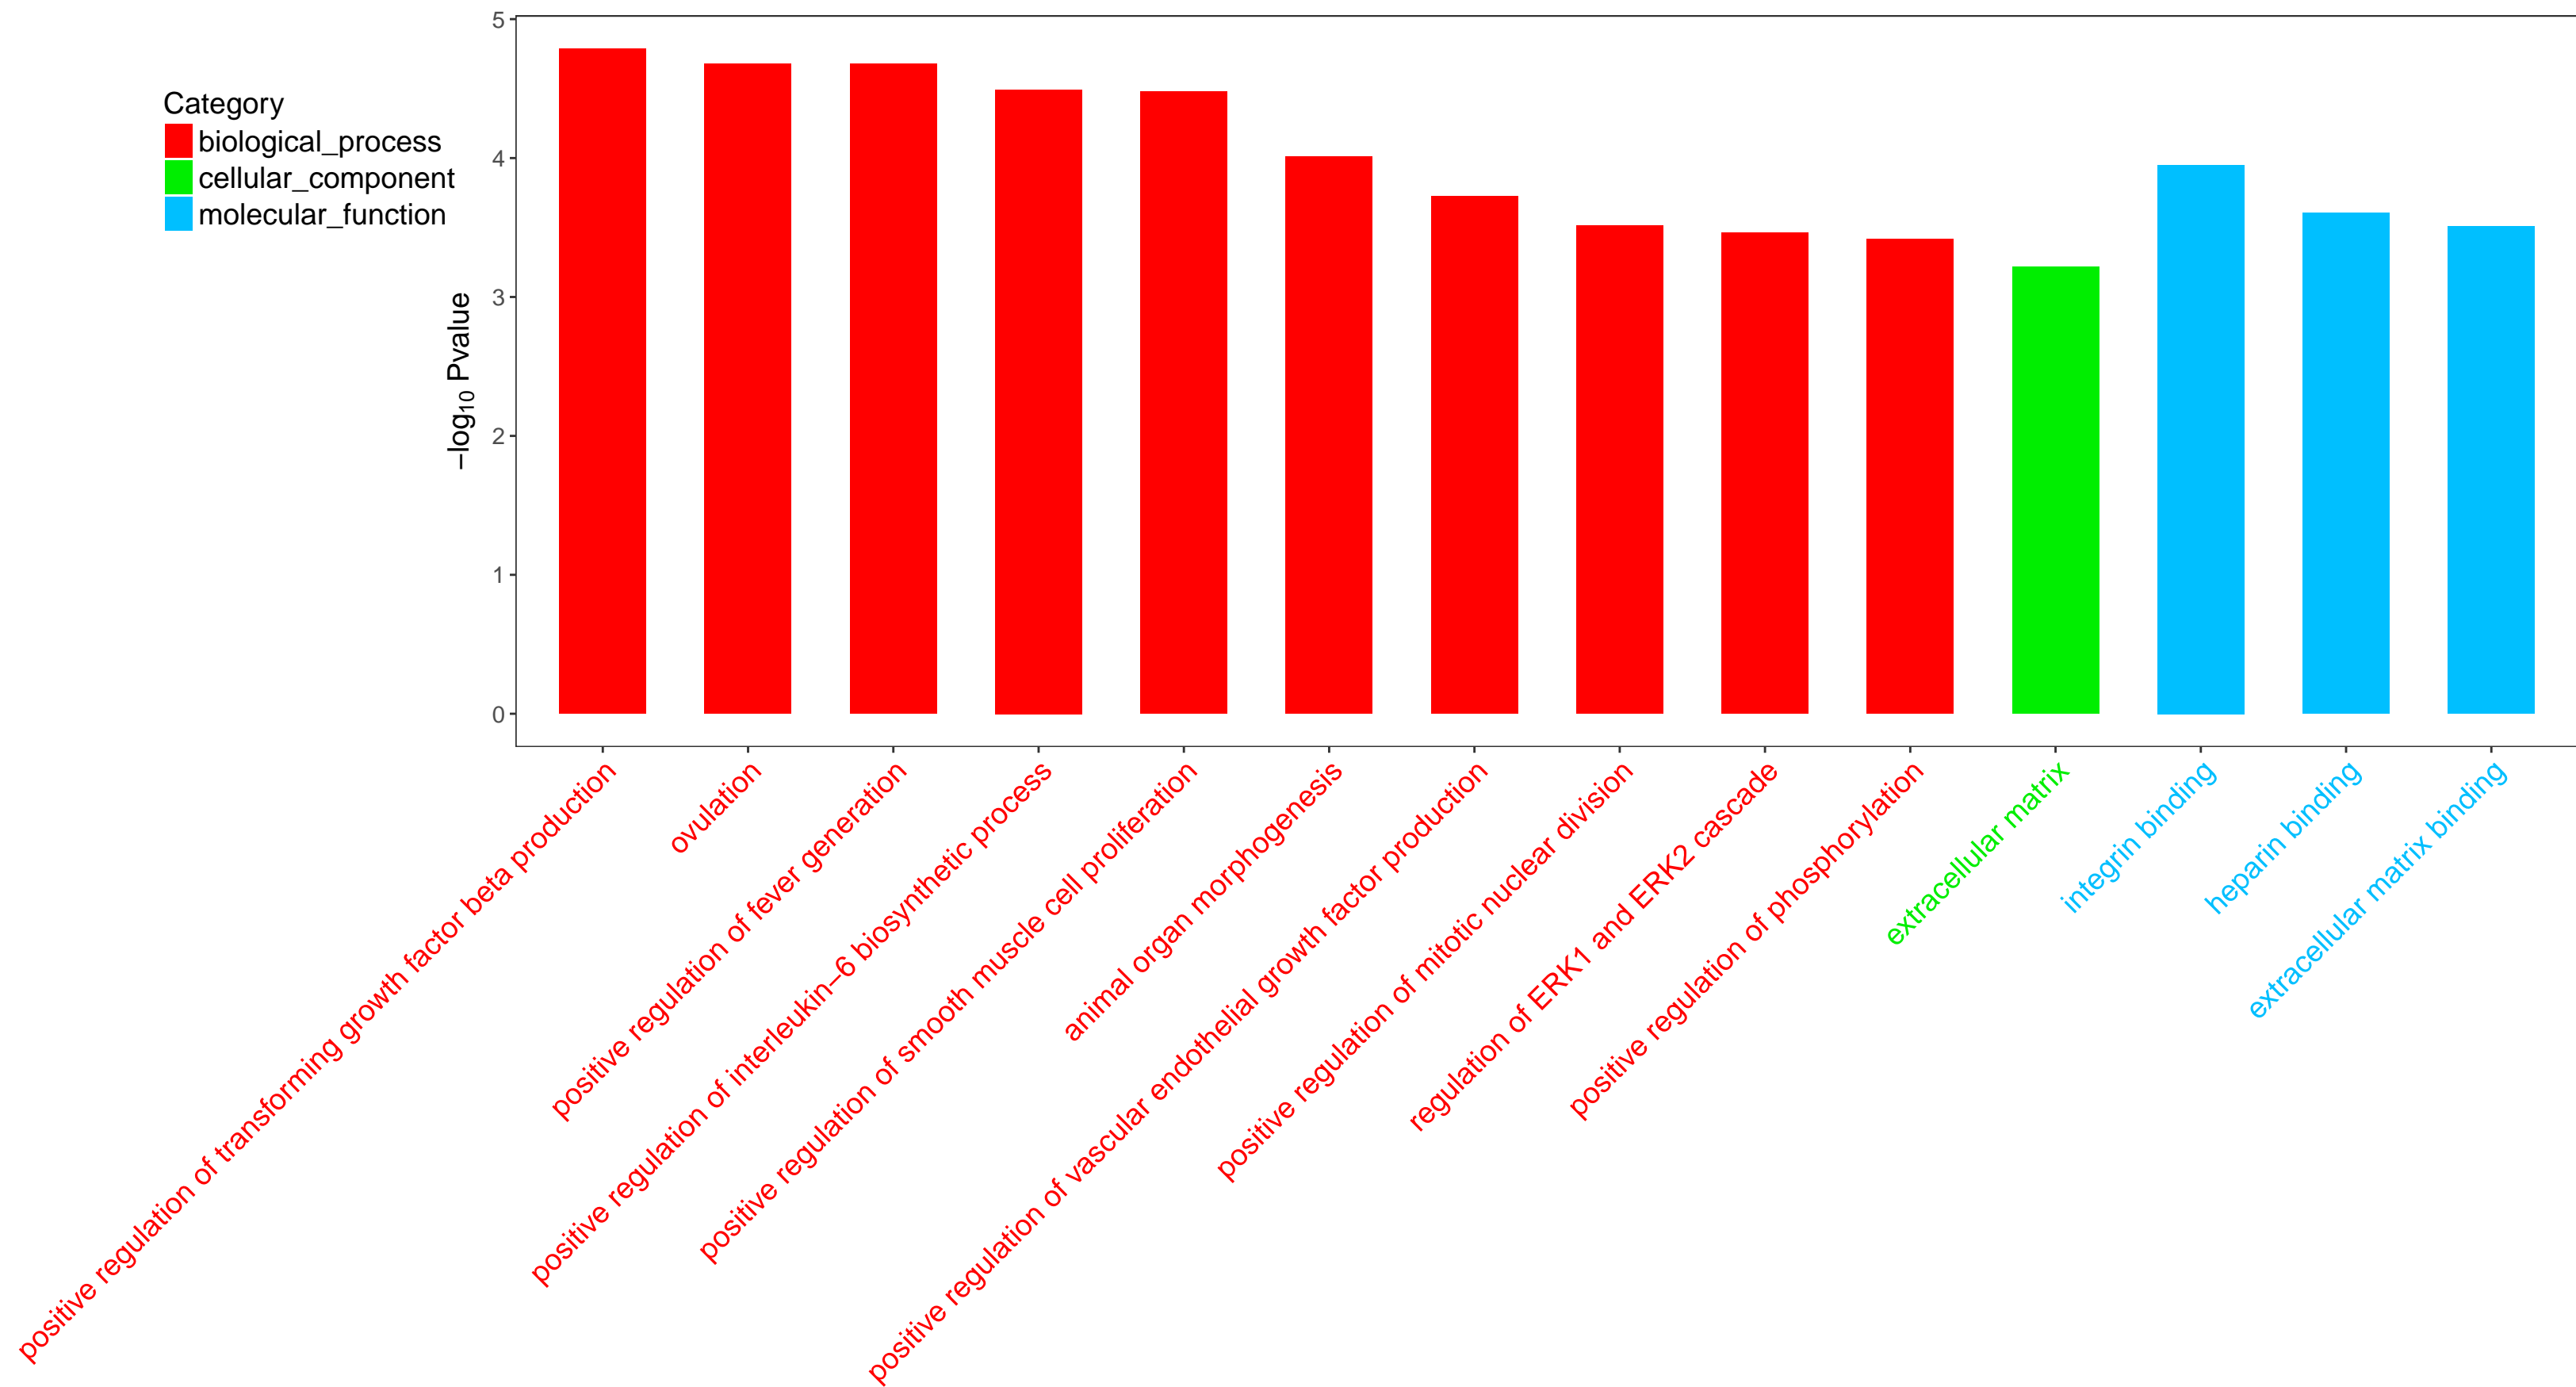

Supplement: Supplementary file 4 [file Supplementary_files.zip]

# KEGG Enrichment top 20

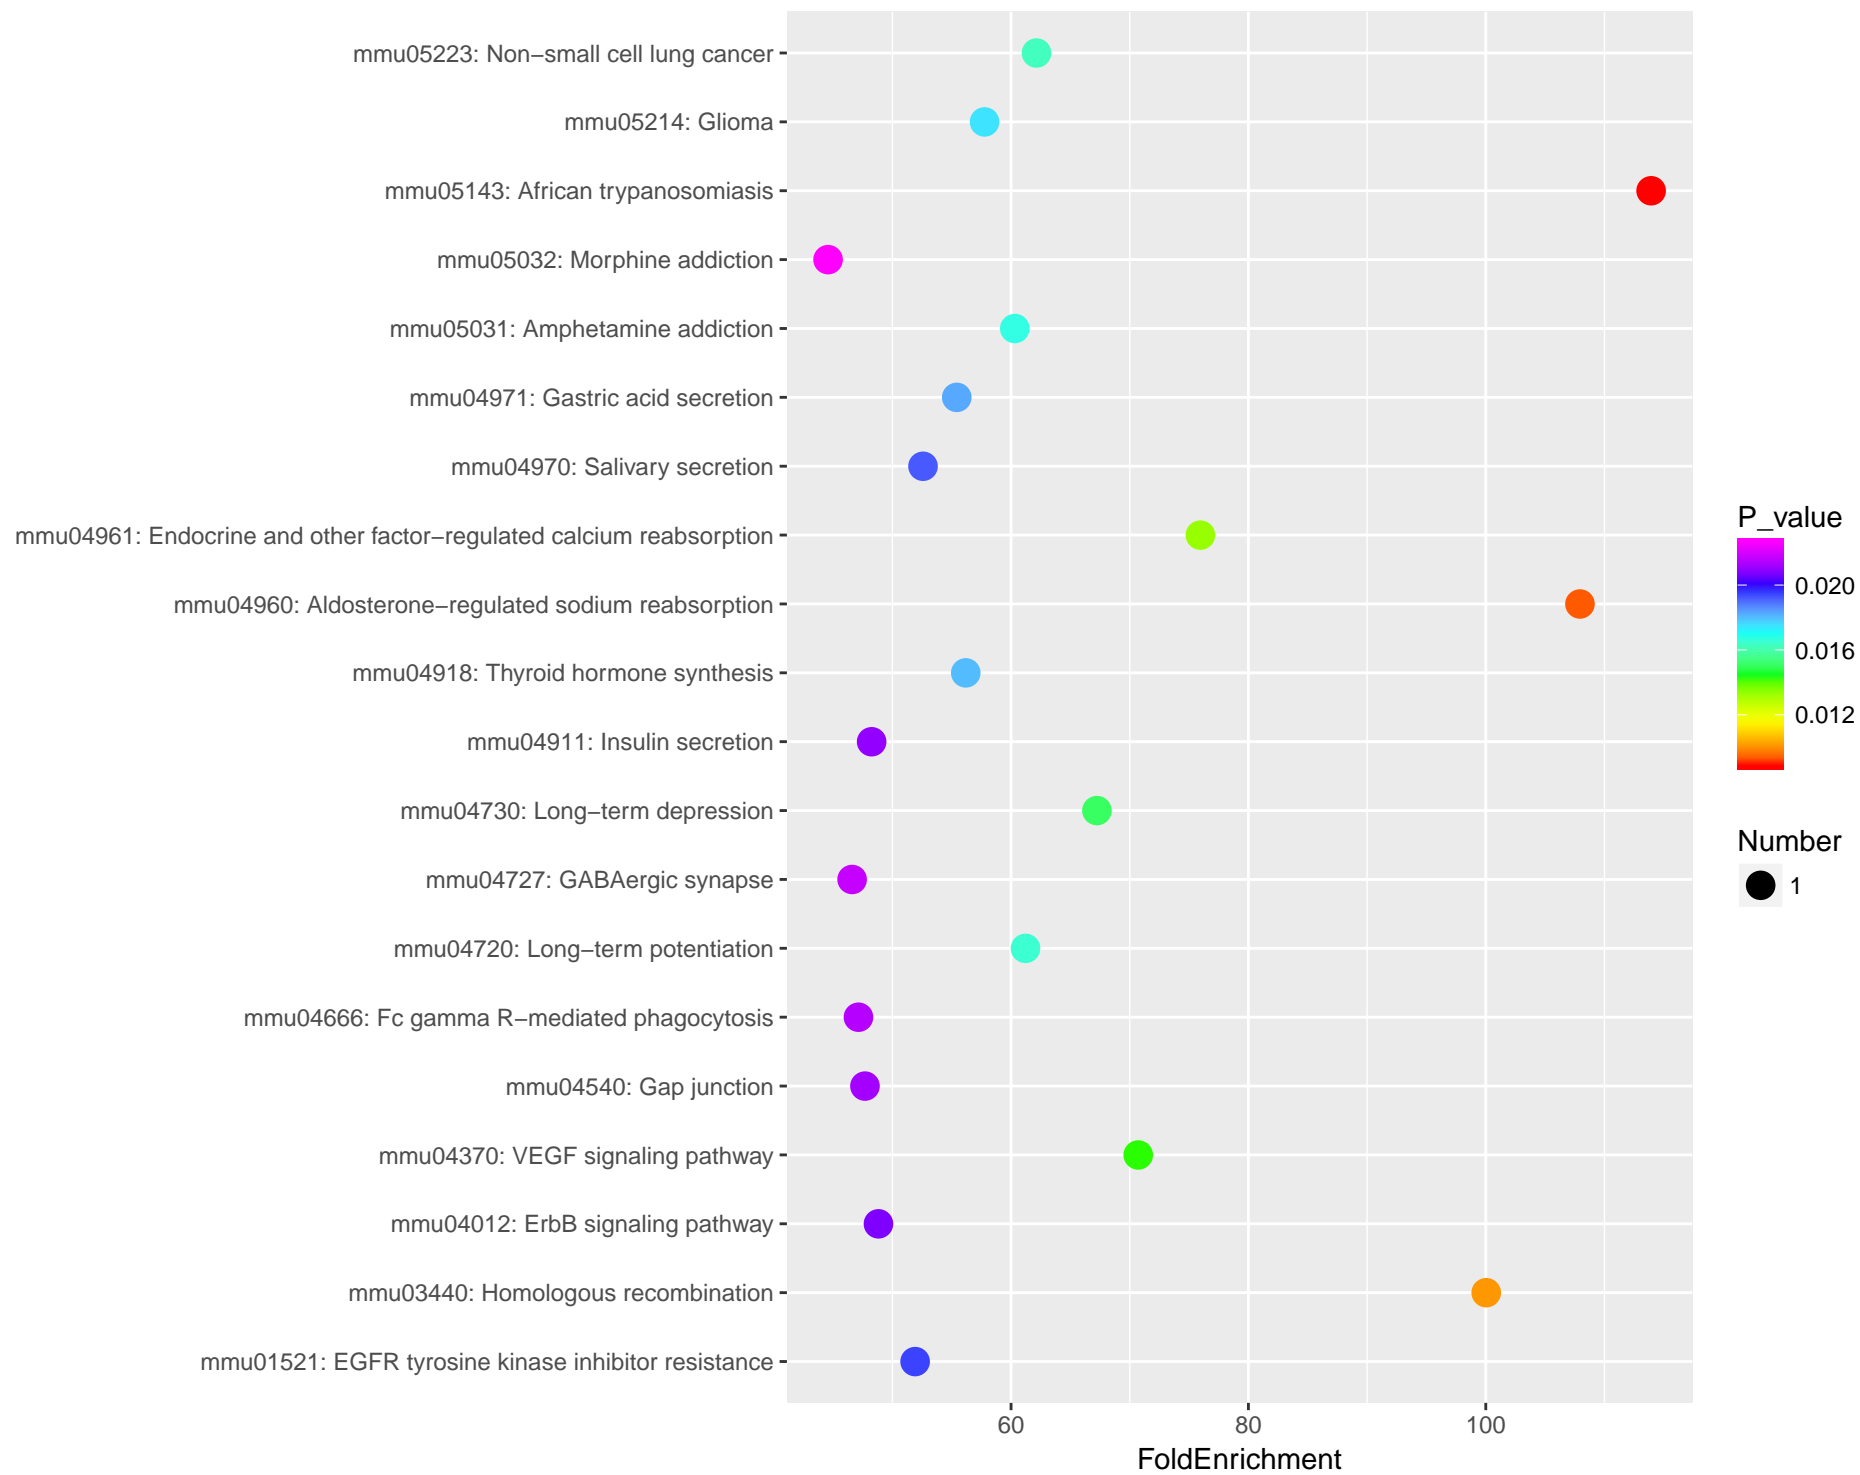

Supplement: Supplementary file 5 [file Supplementary_files.zip]

# KEGG Enrichment top 20

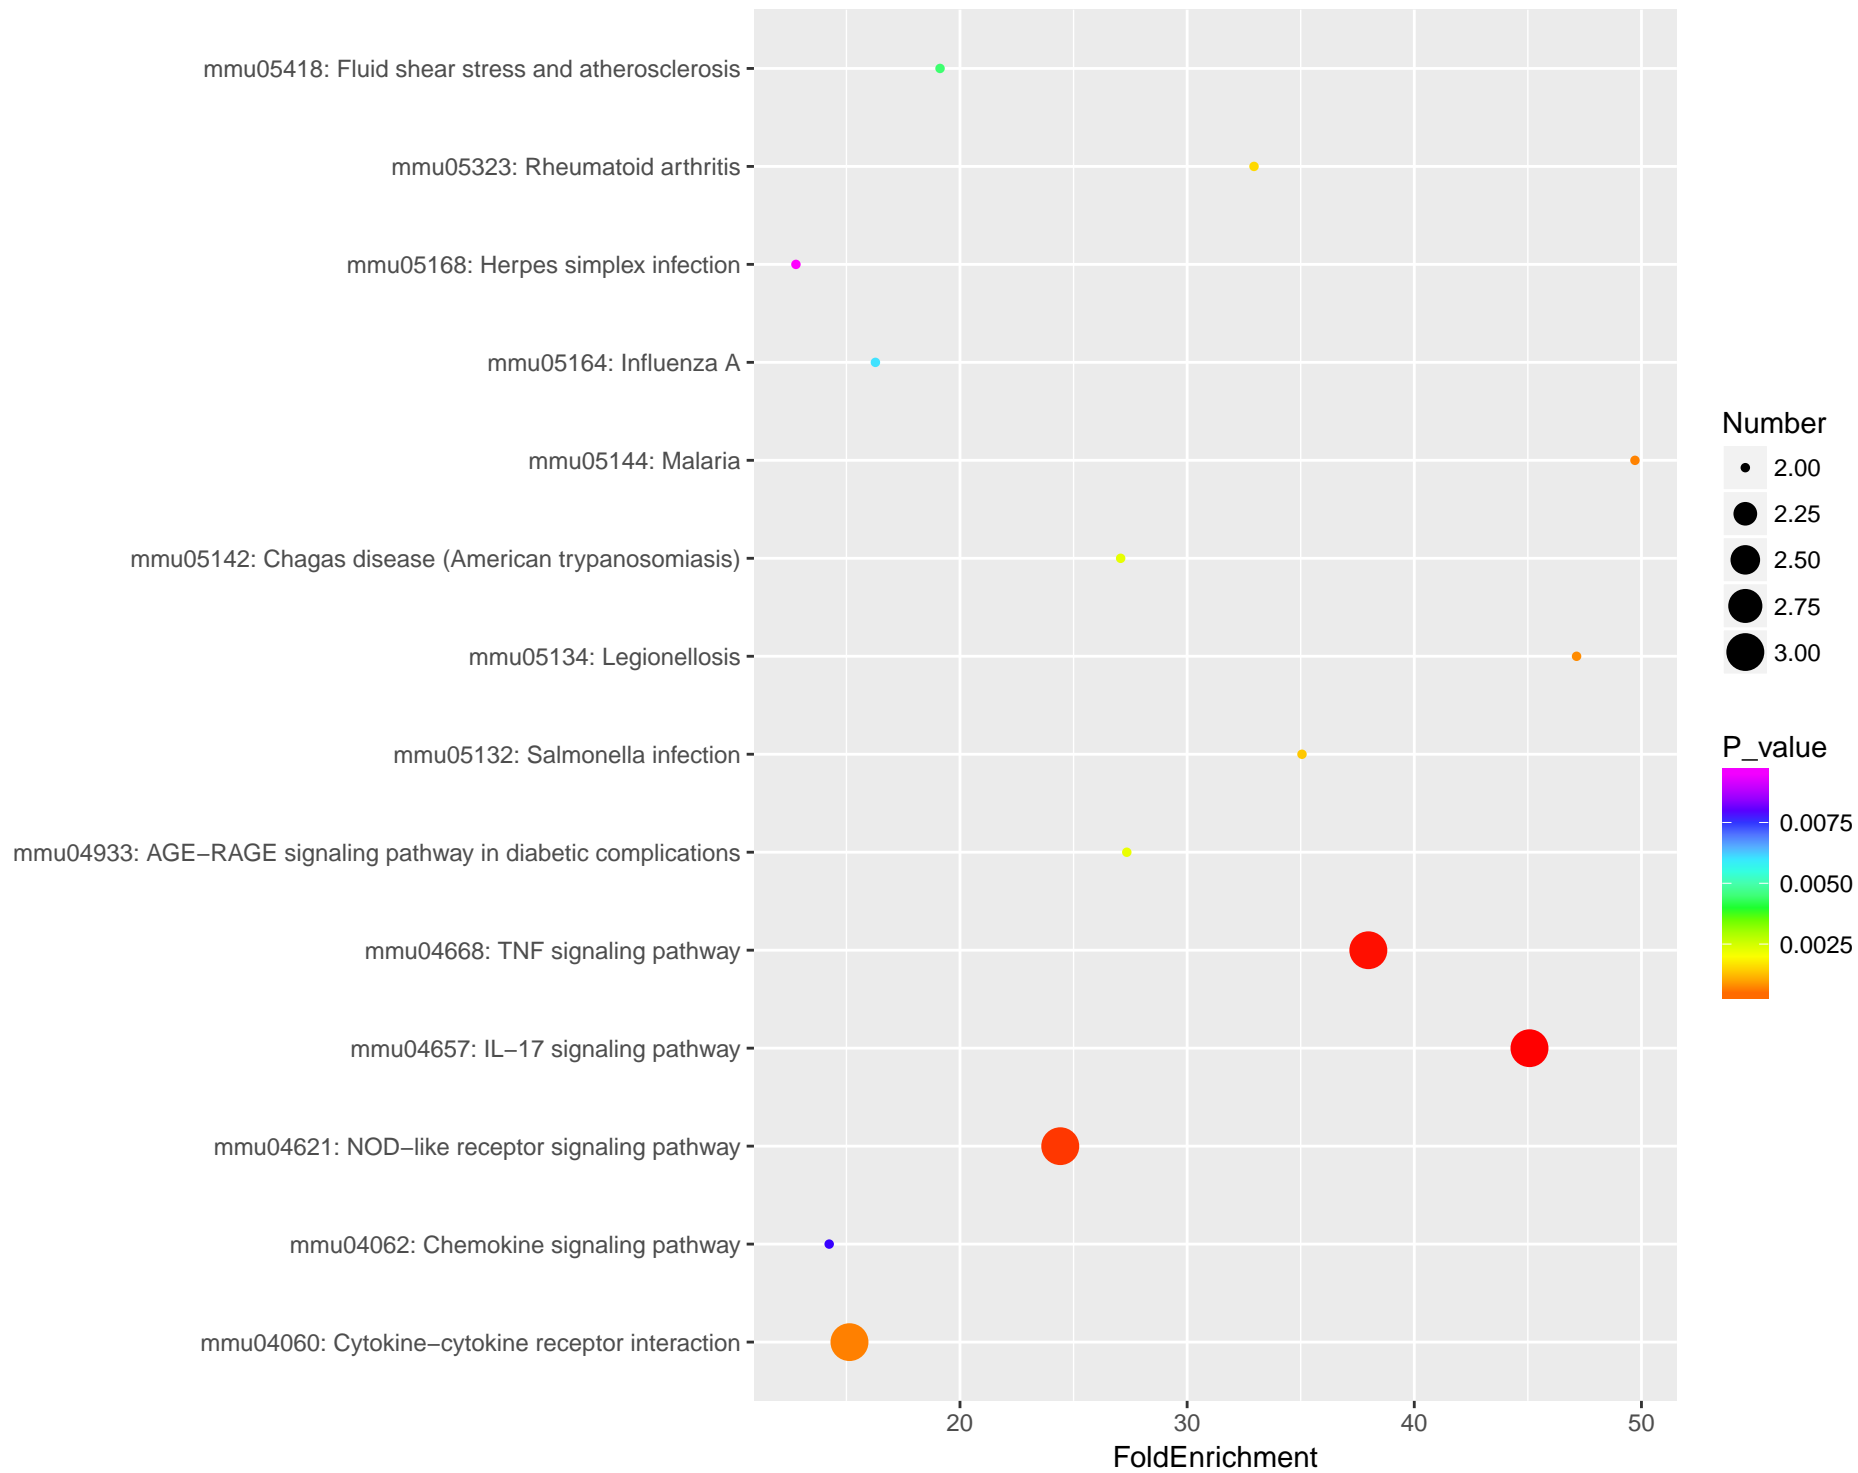

Supplement: Supplementary file 6 [file Supplementary_files.zip]

# KEGG Enrichment top 20

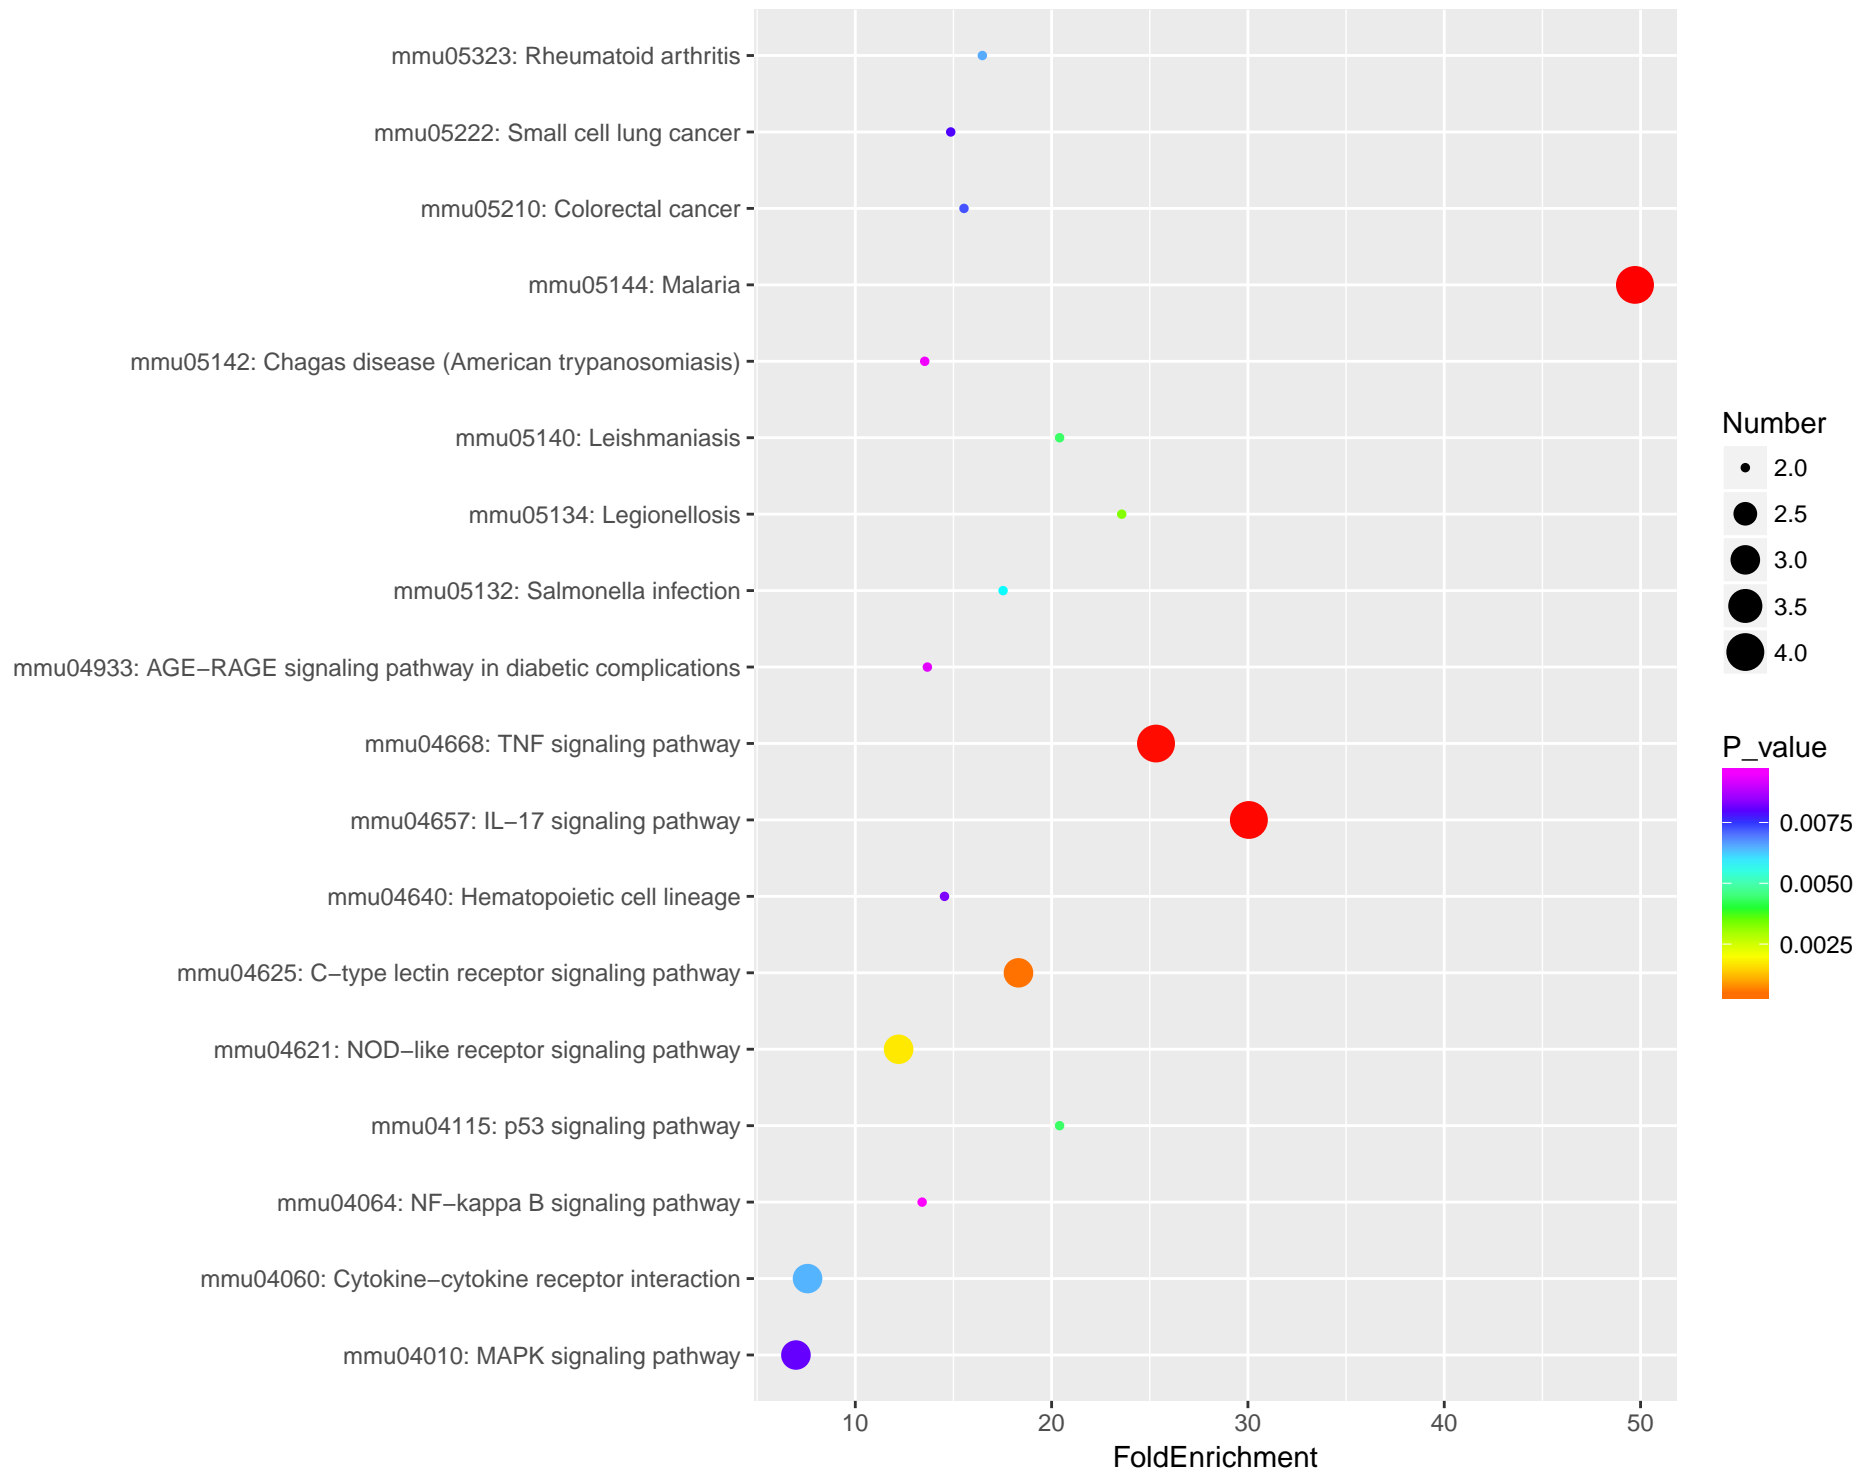

Supplement: Supplementary file 7 [file Supplementary_files.zip]

# KEGG Enrichment top 20

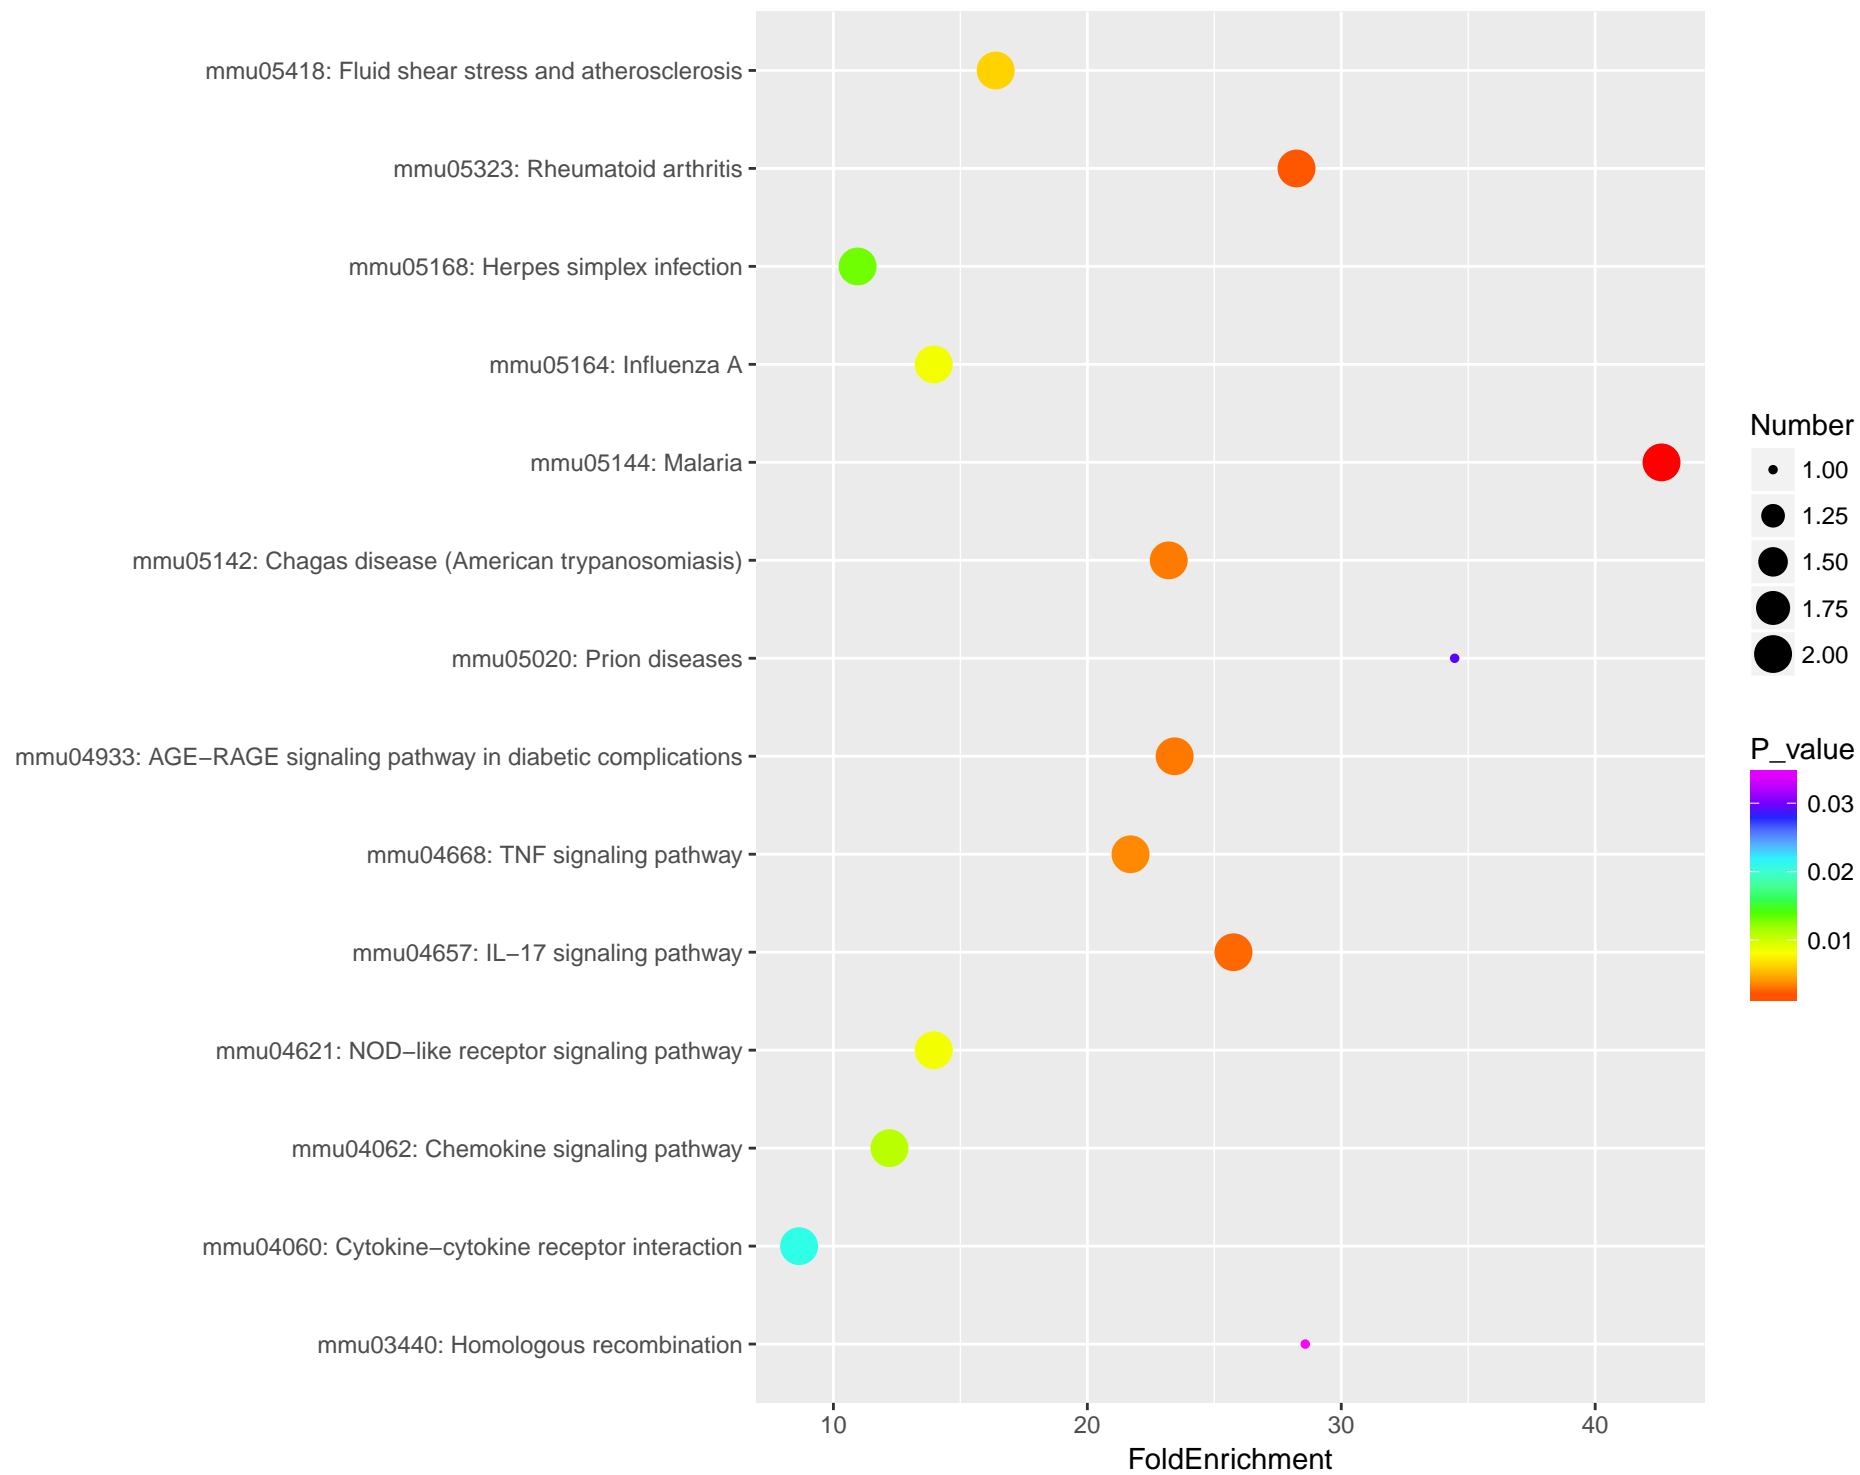

Supplement: Supplementary file 8 [file Supplementary_files.zip]

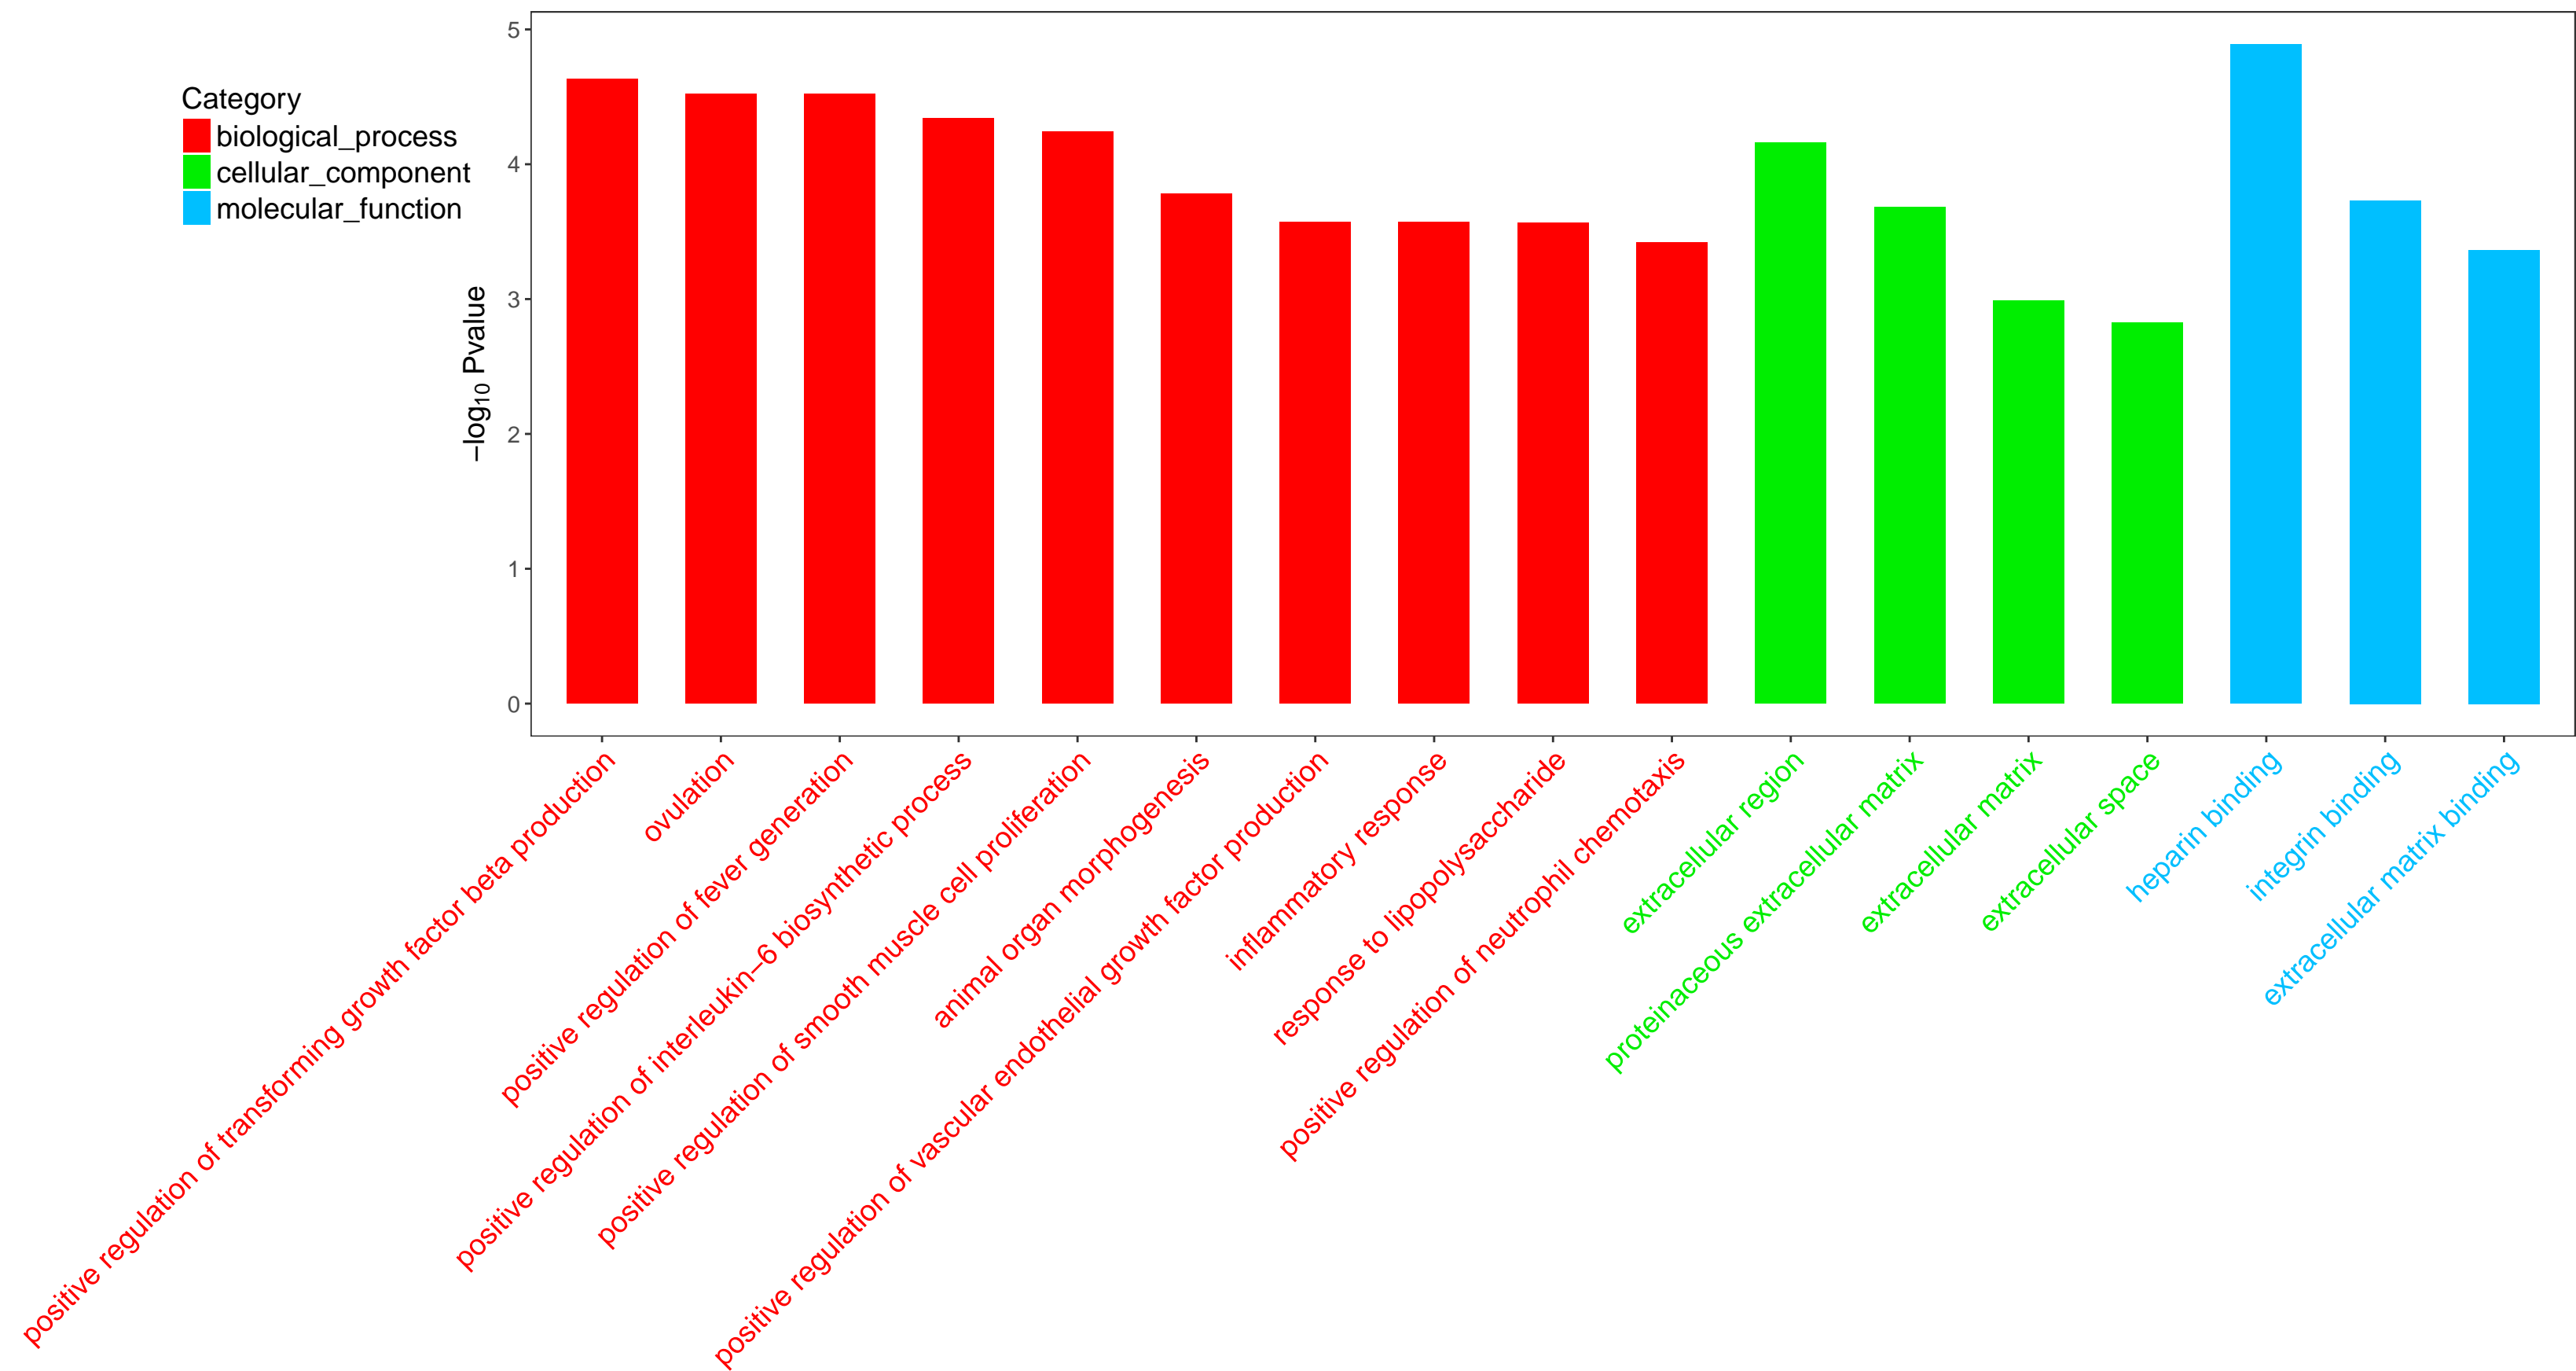

Supplement: Supplementary file 9 [file Supplementary_files.zip]

# KEGG Enrichment top 20

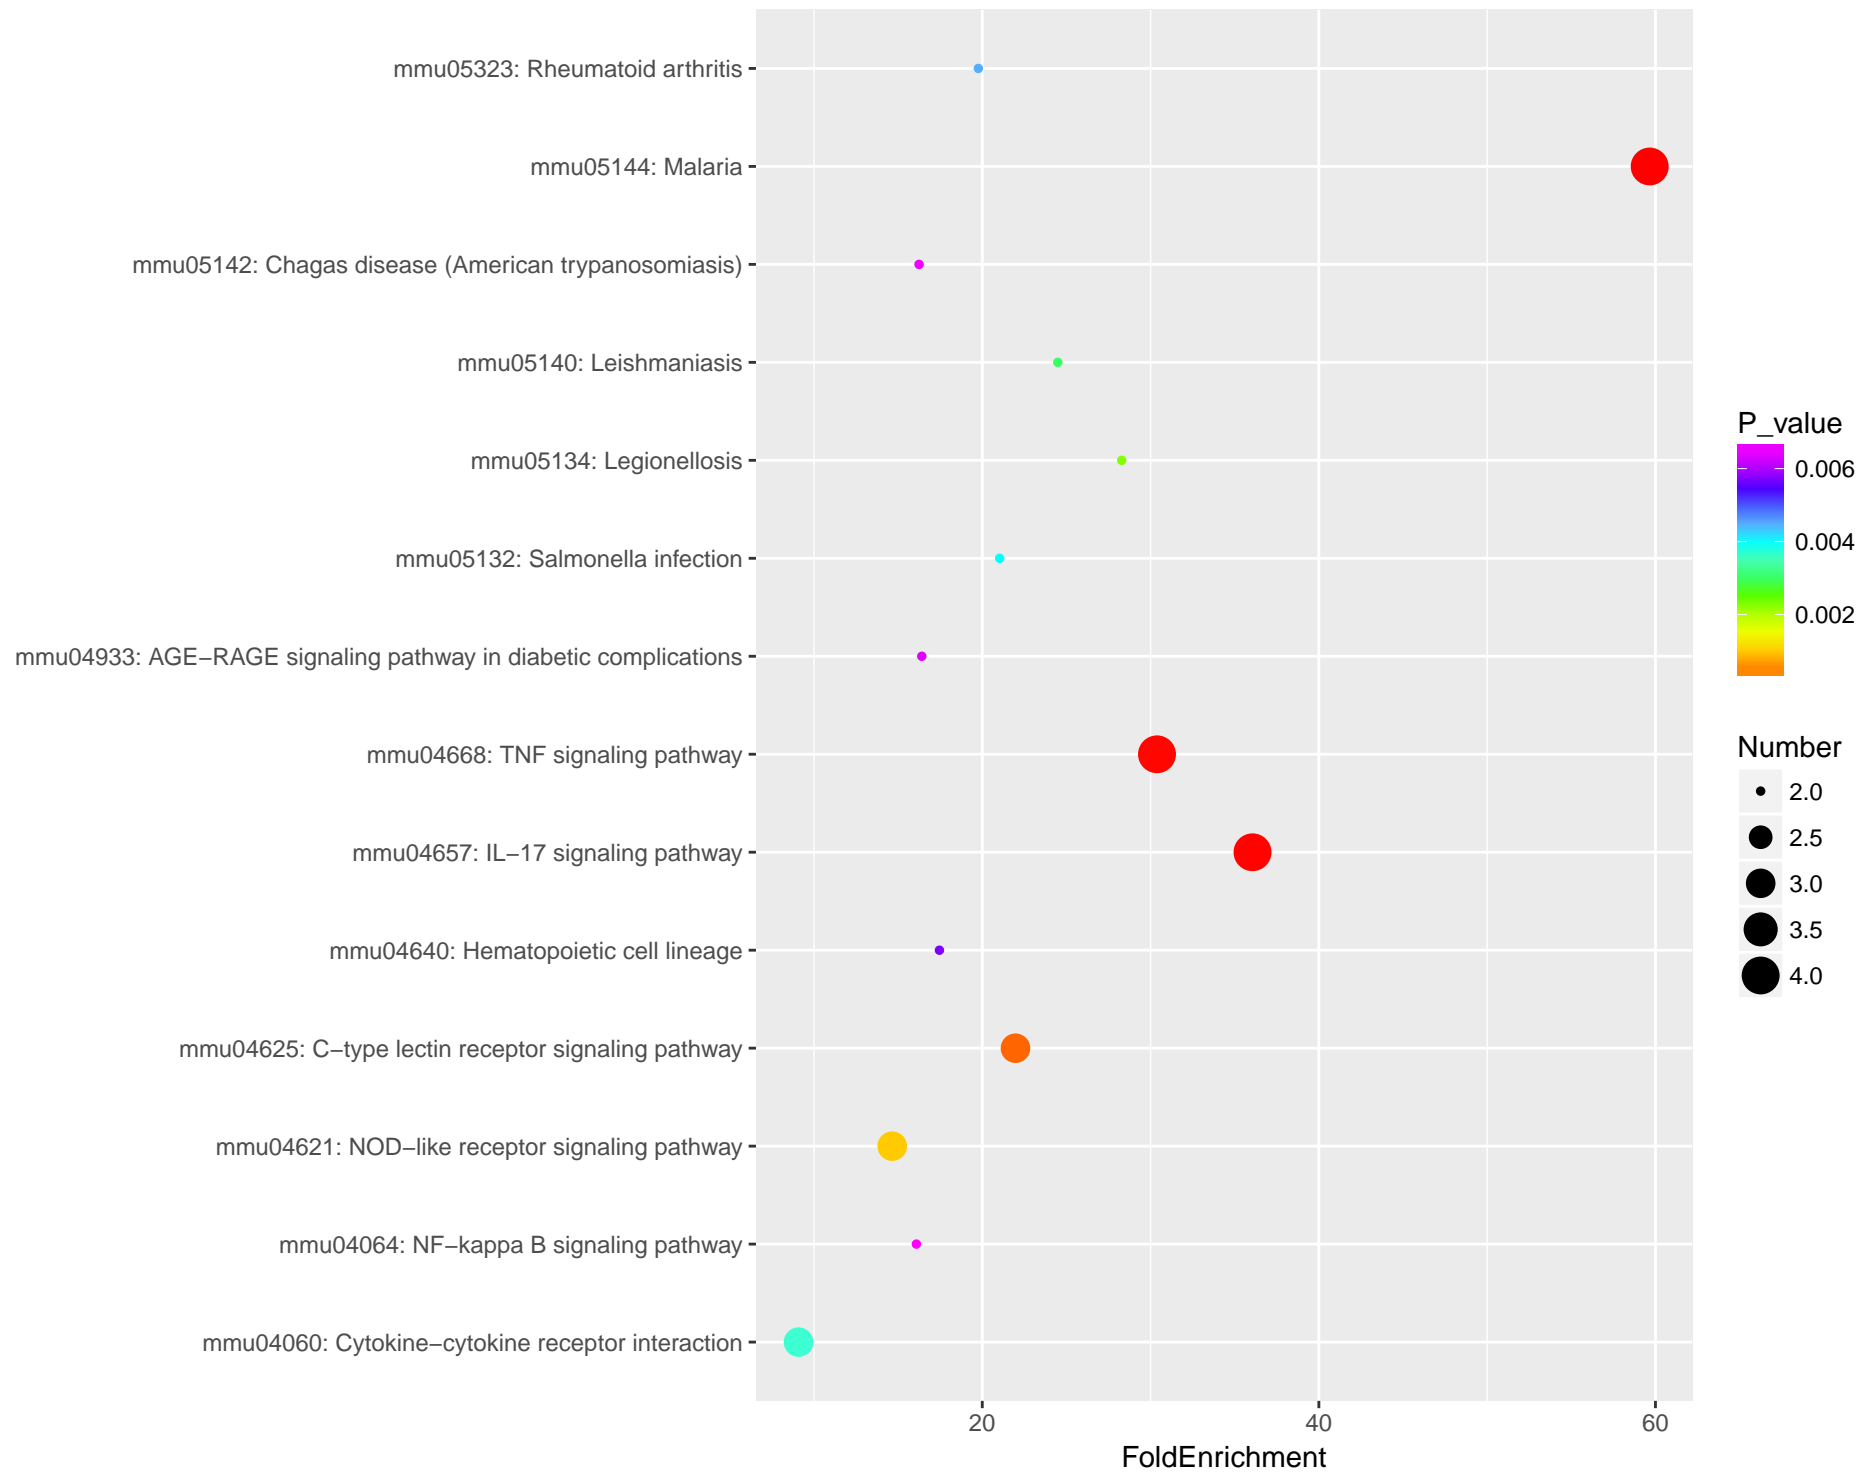

Supplement: Supplementary file 10 [file Supplementary_files.zip]

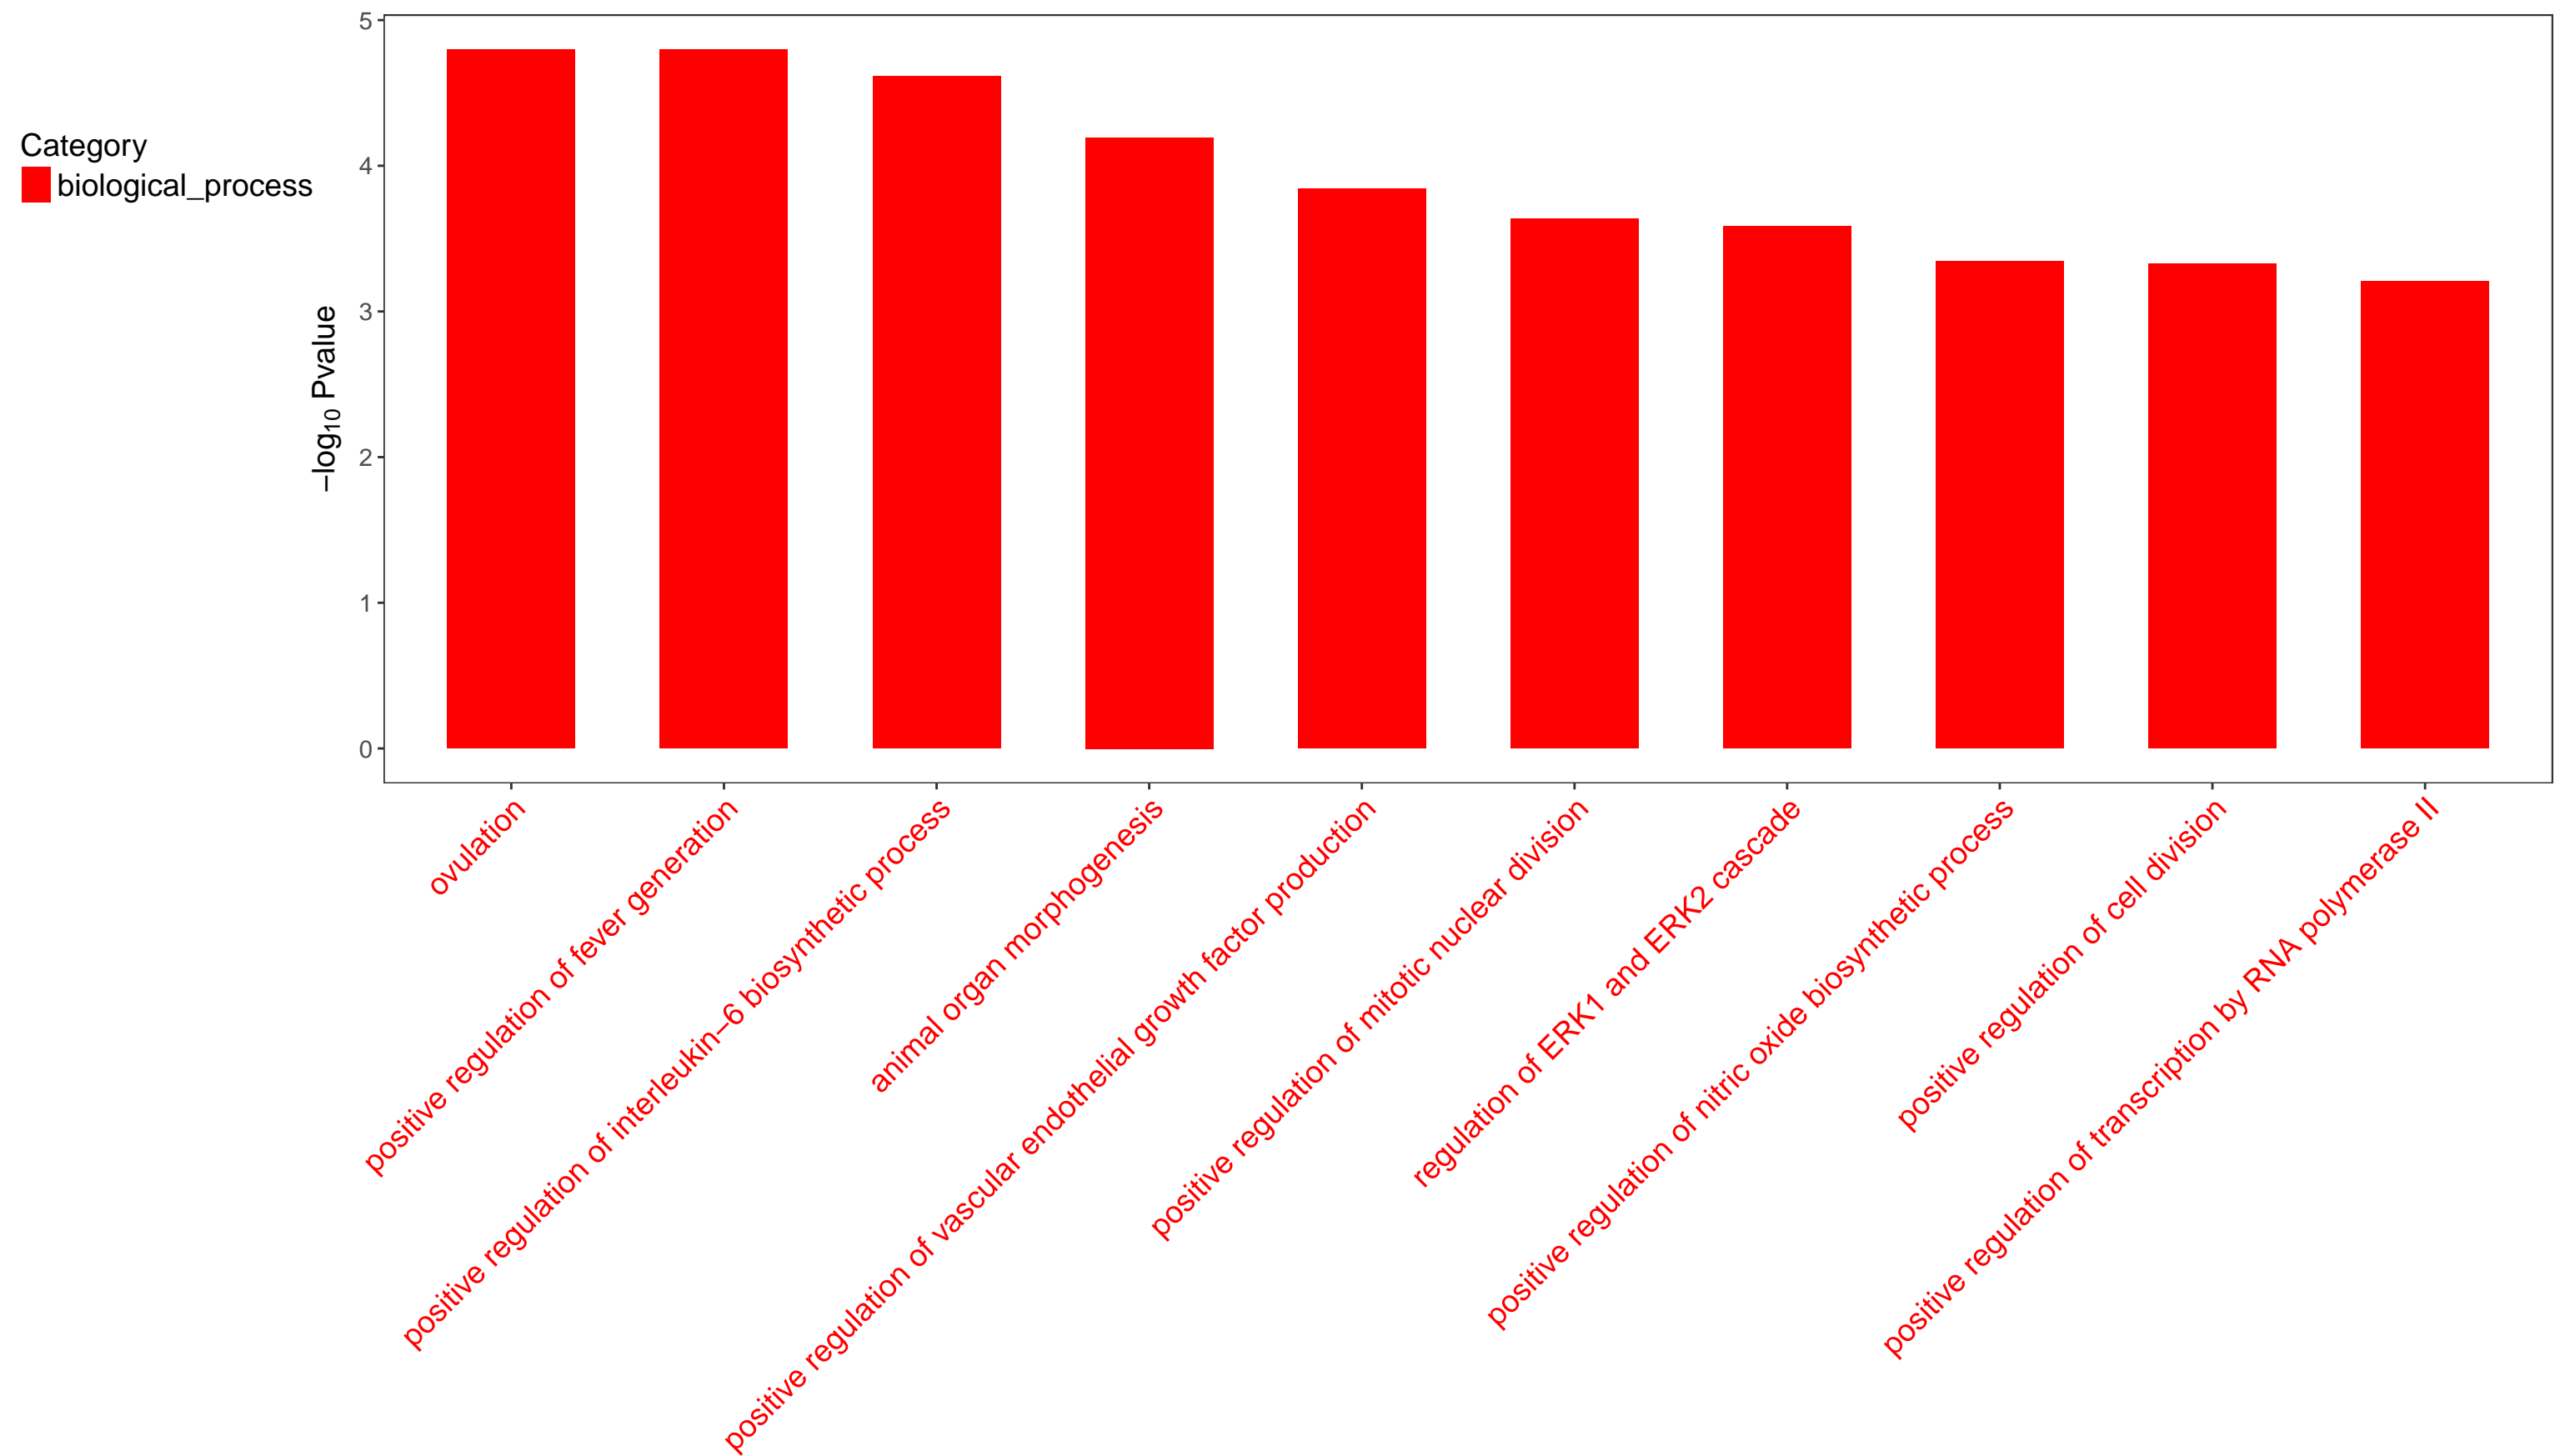

Supplement: Supplementary file 11 [file Supplementary_files.zip]

# KEGG Enrichment top 20



Supplement: Supplementary file 12 [file Supplementary_files.zip]

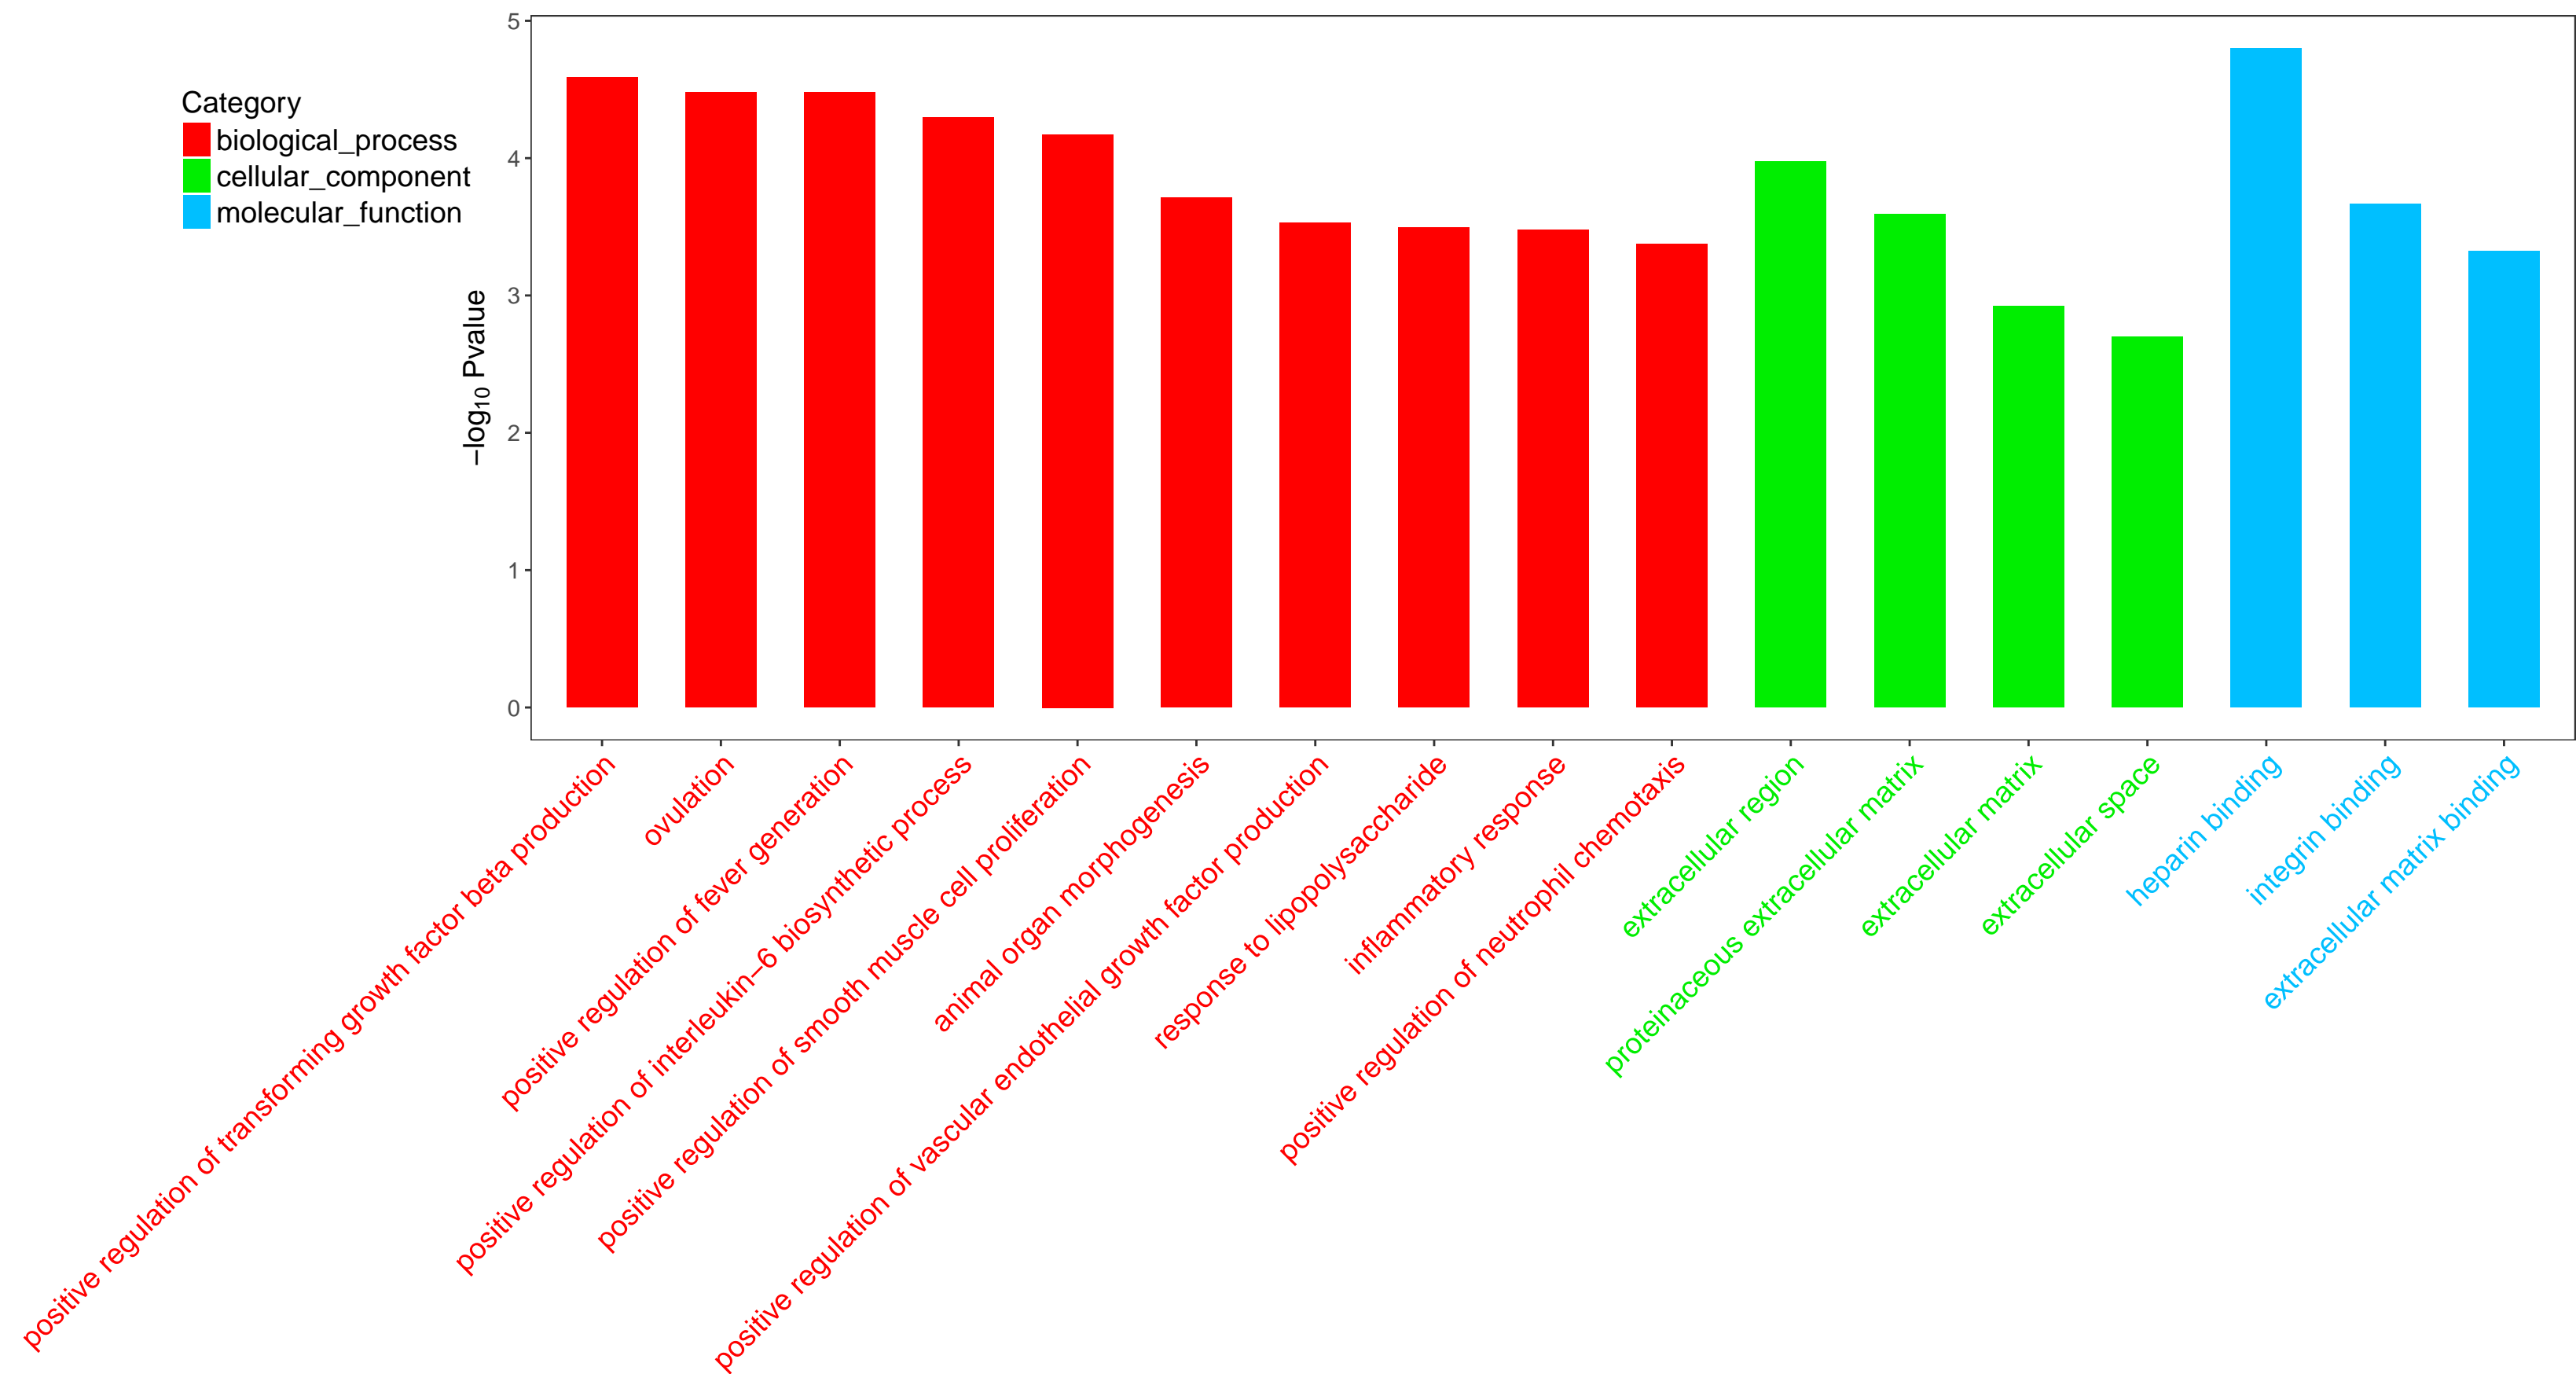

Supplement: Supplementary file 13 [file Supplementary_files.zip]

Category

- biological\_process
- cellular\_component
- molecular\_function

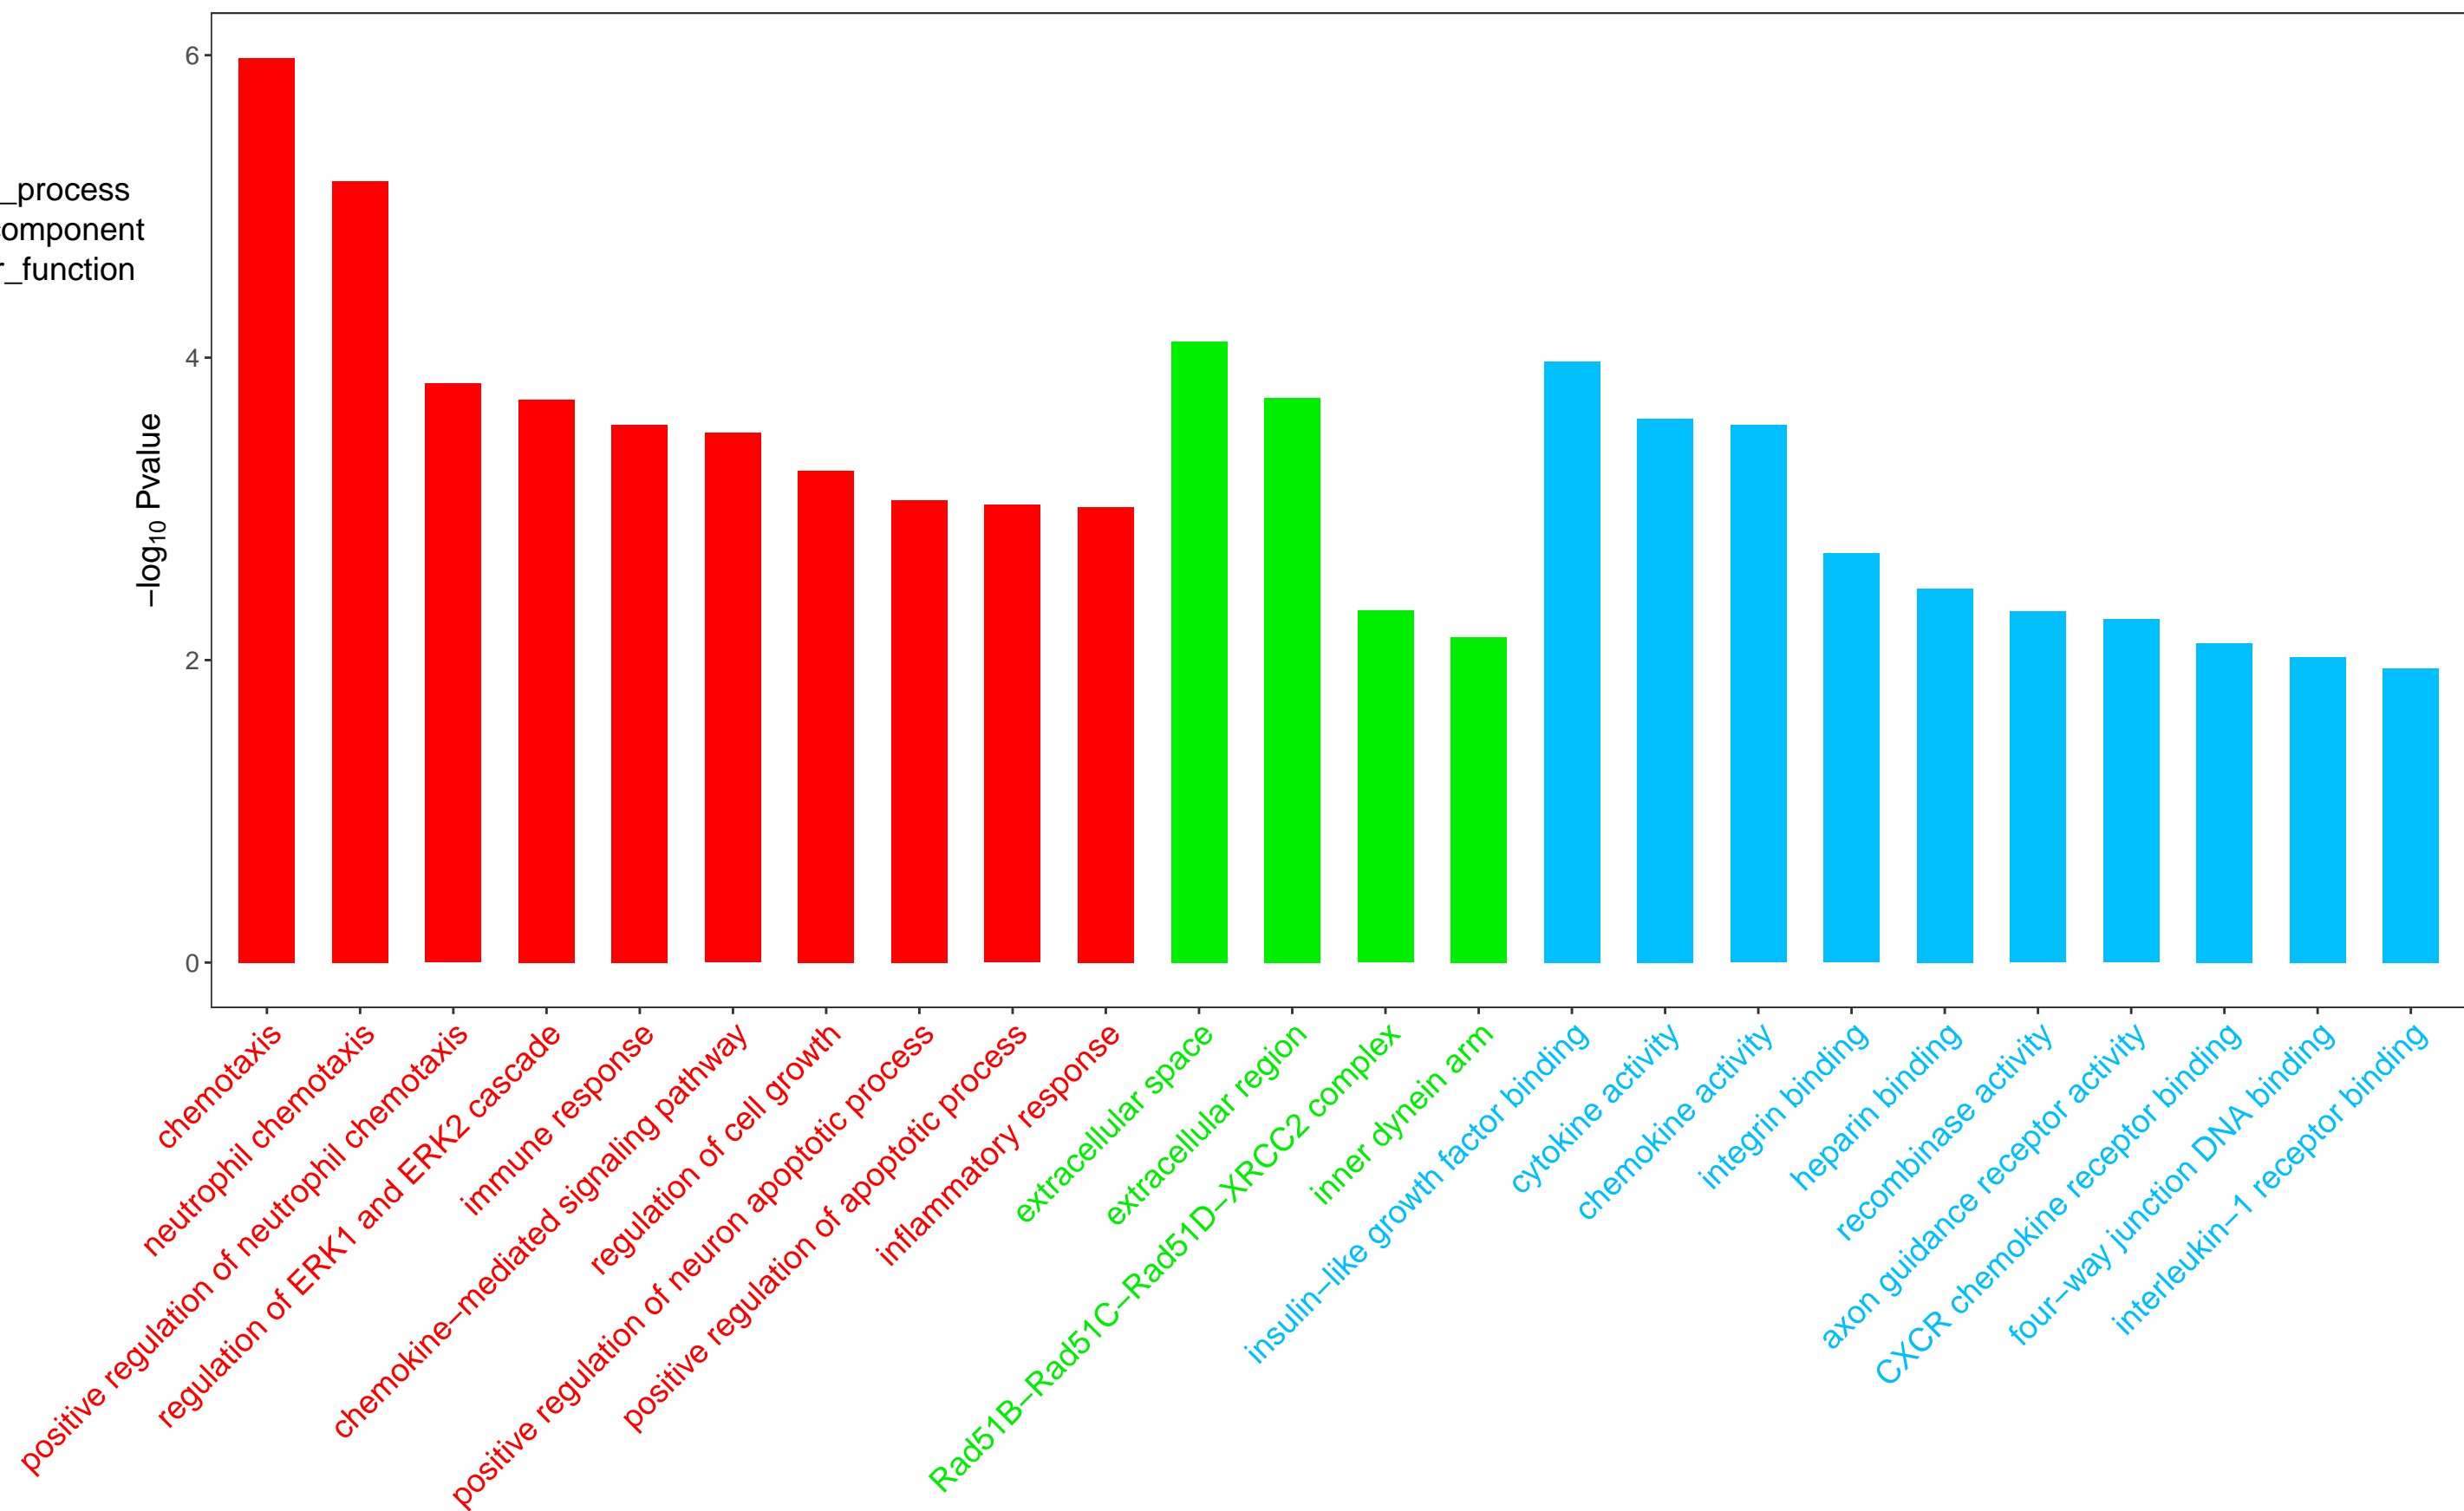

Supplement: Supplementary file 14 [file Supplementary_files.zip]

# KEGG Enrichment top 20

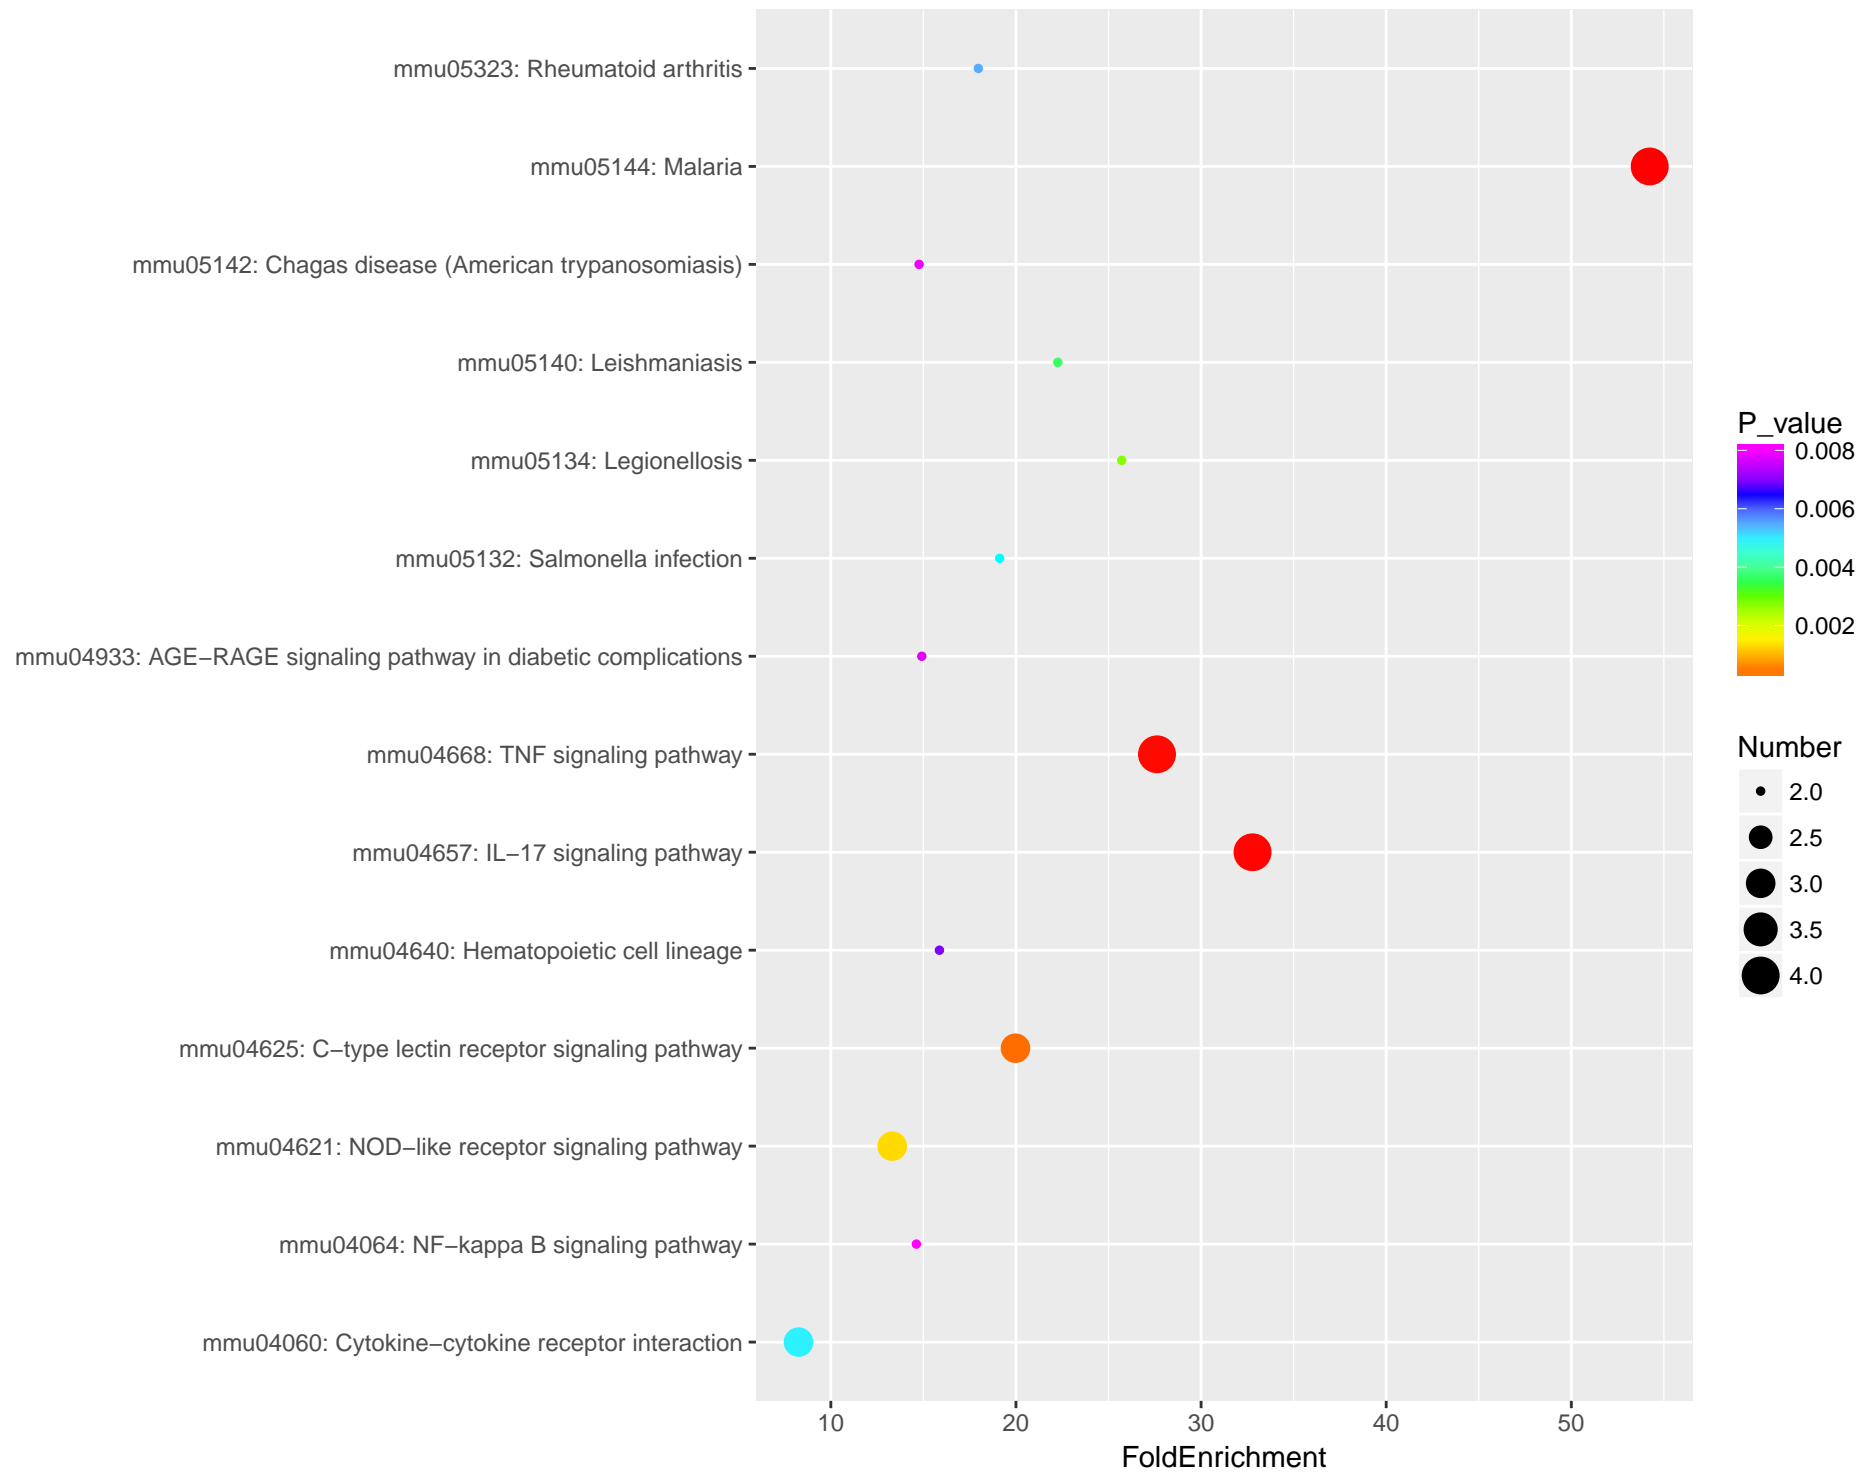

Supplement: Supplementary file 15 [file Supplementary_files.zip]

# KEGG Enrichment top 20

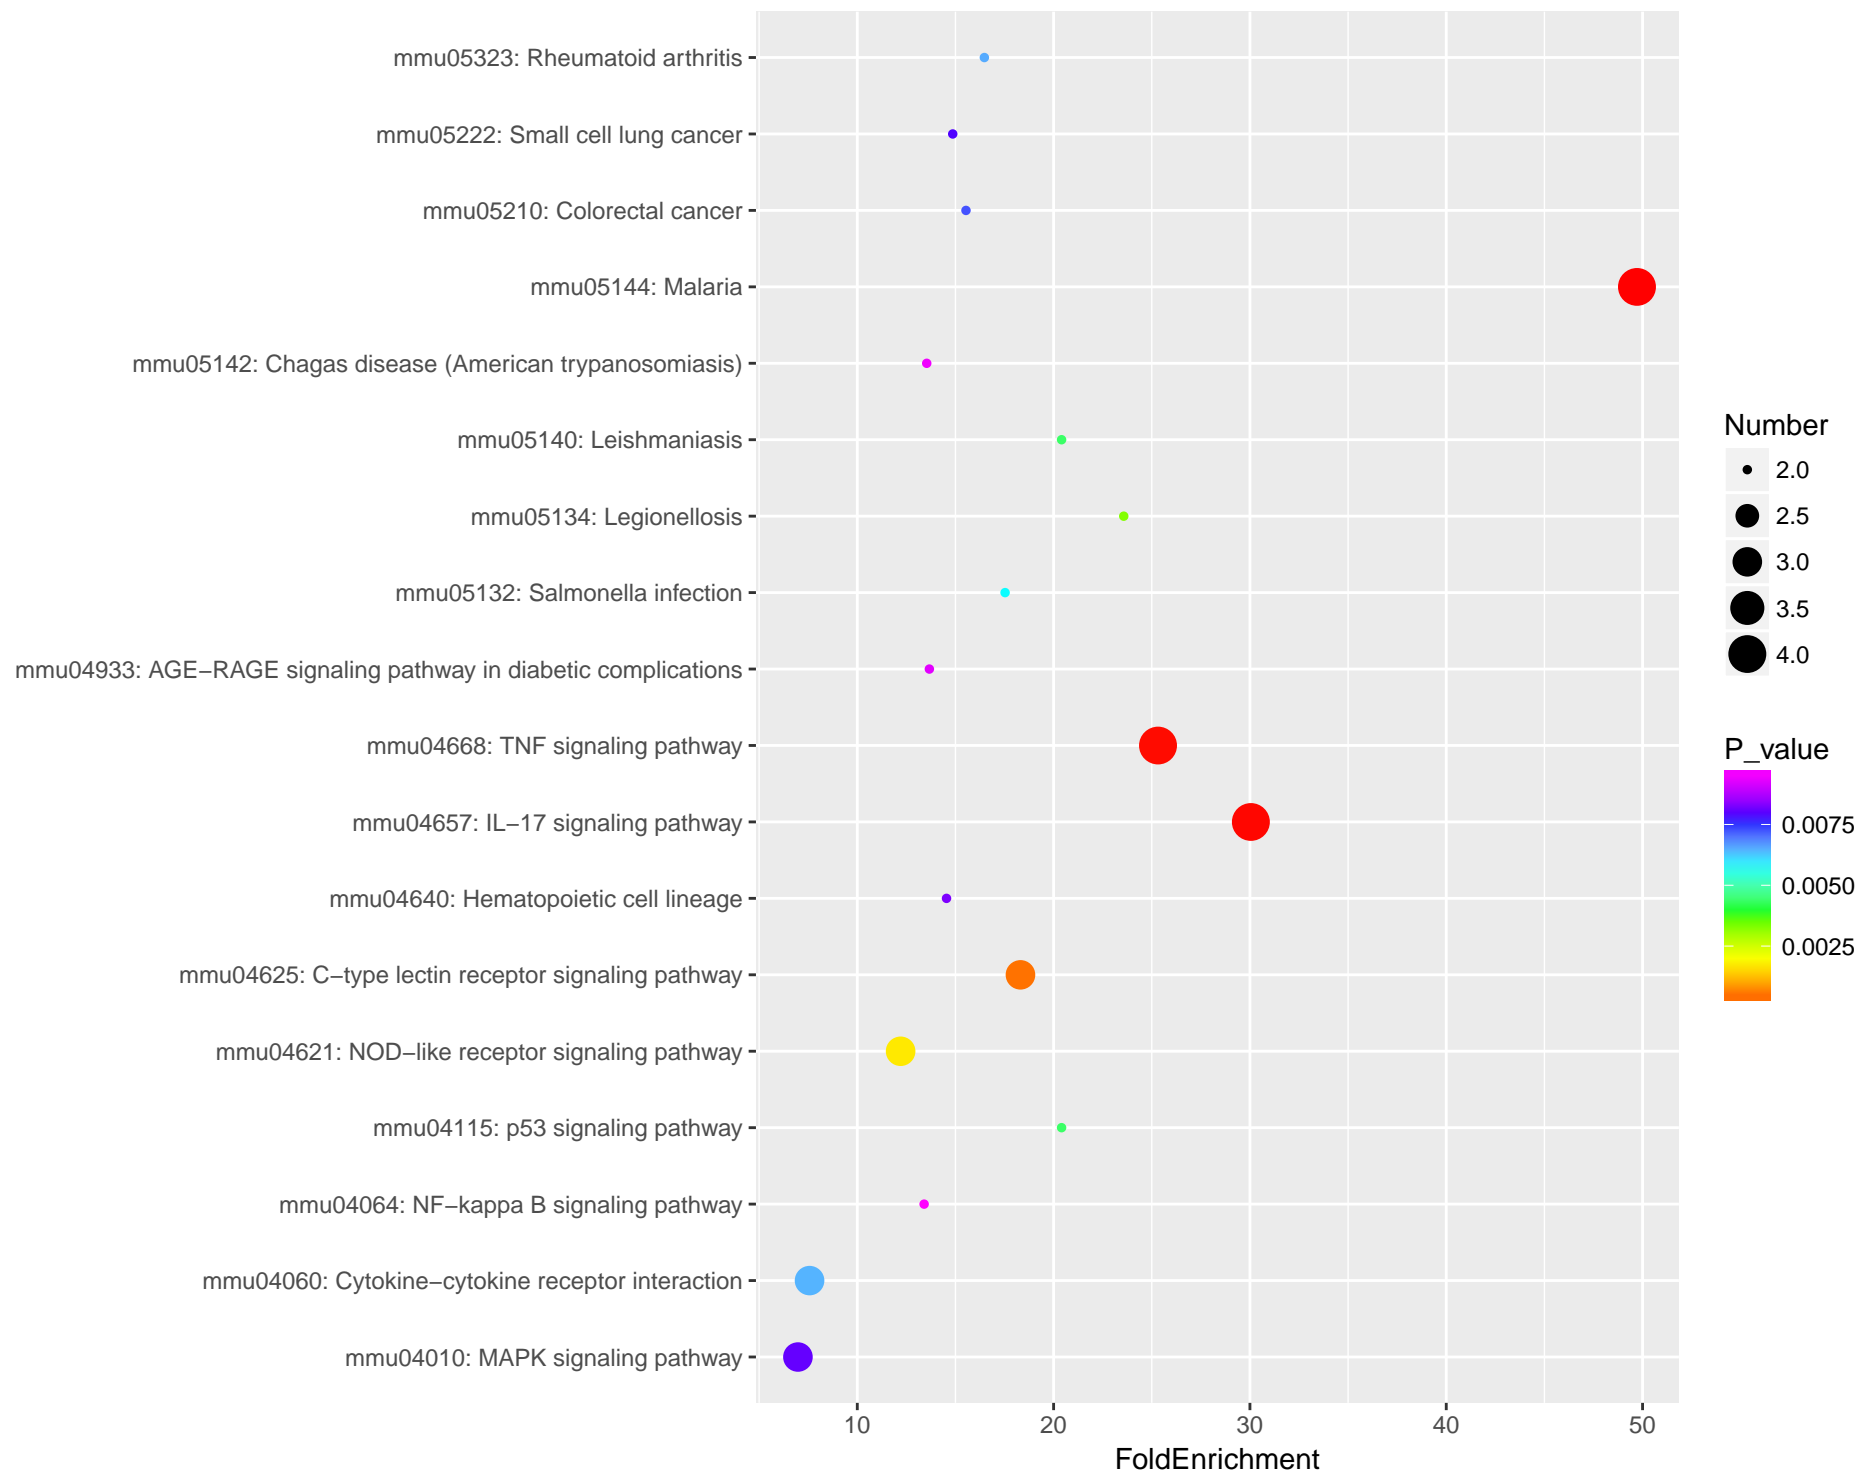

Supplement: Supplementary file 16 [file Supplementary_files.zip]

# KEGG Enrichment top 20

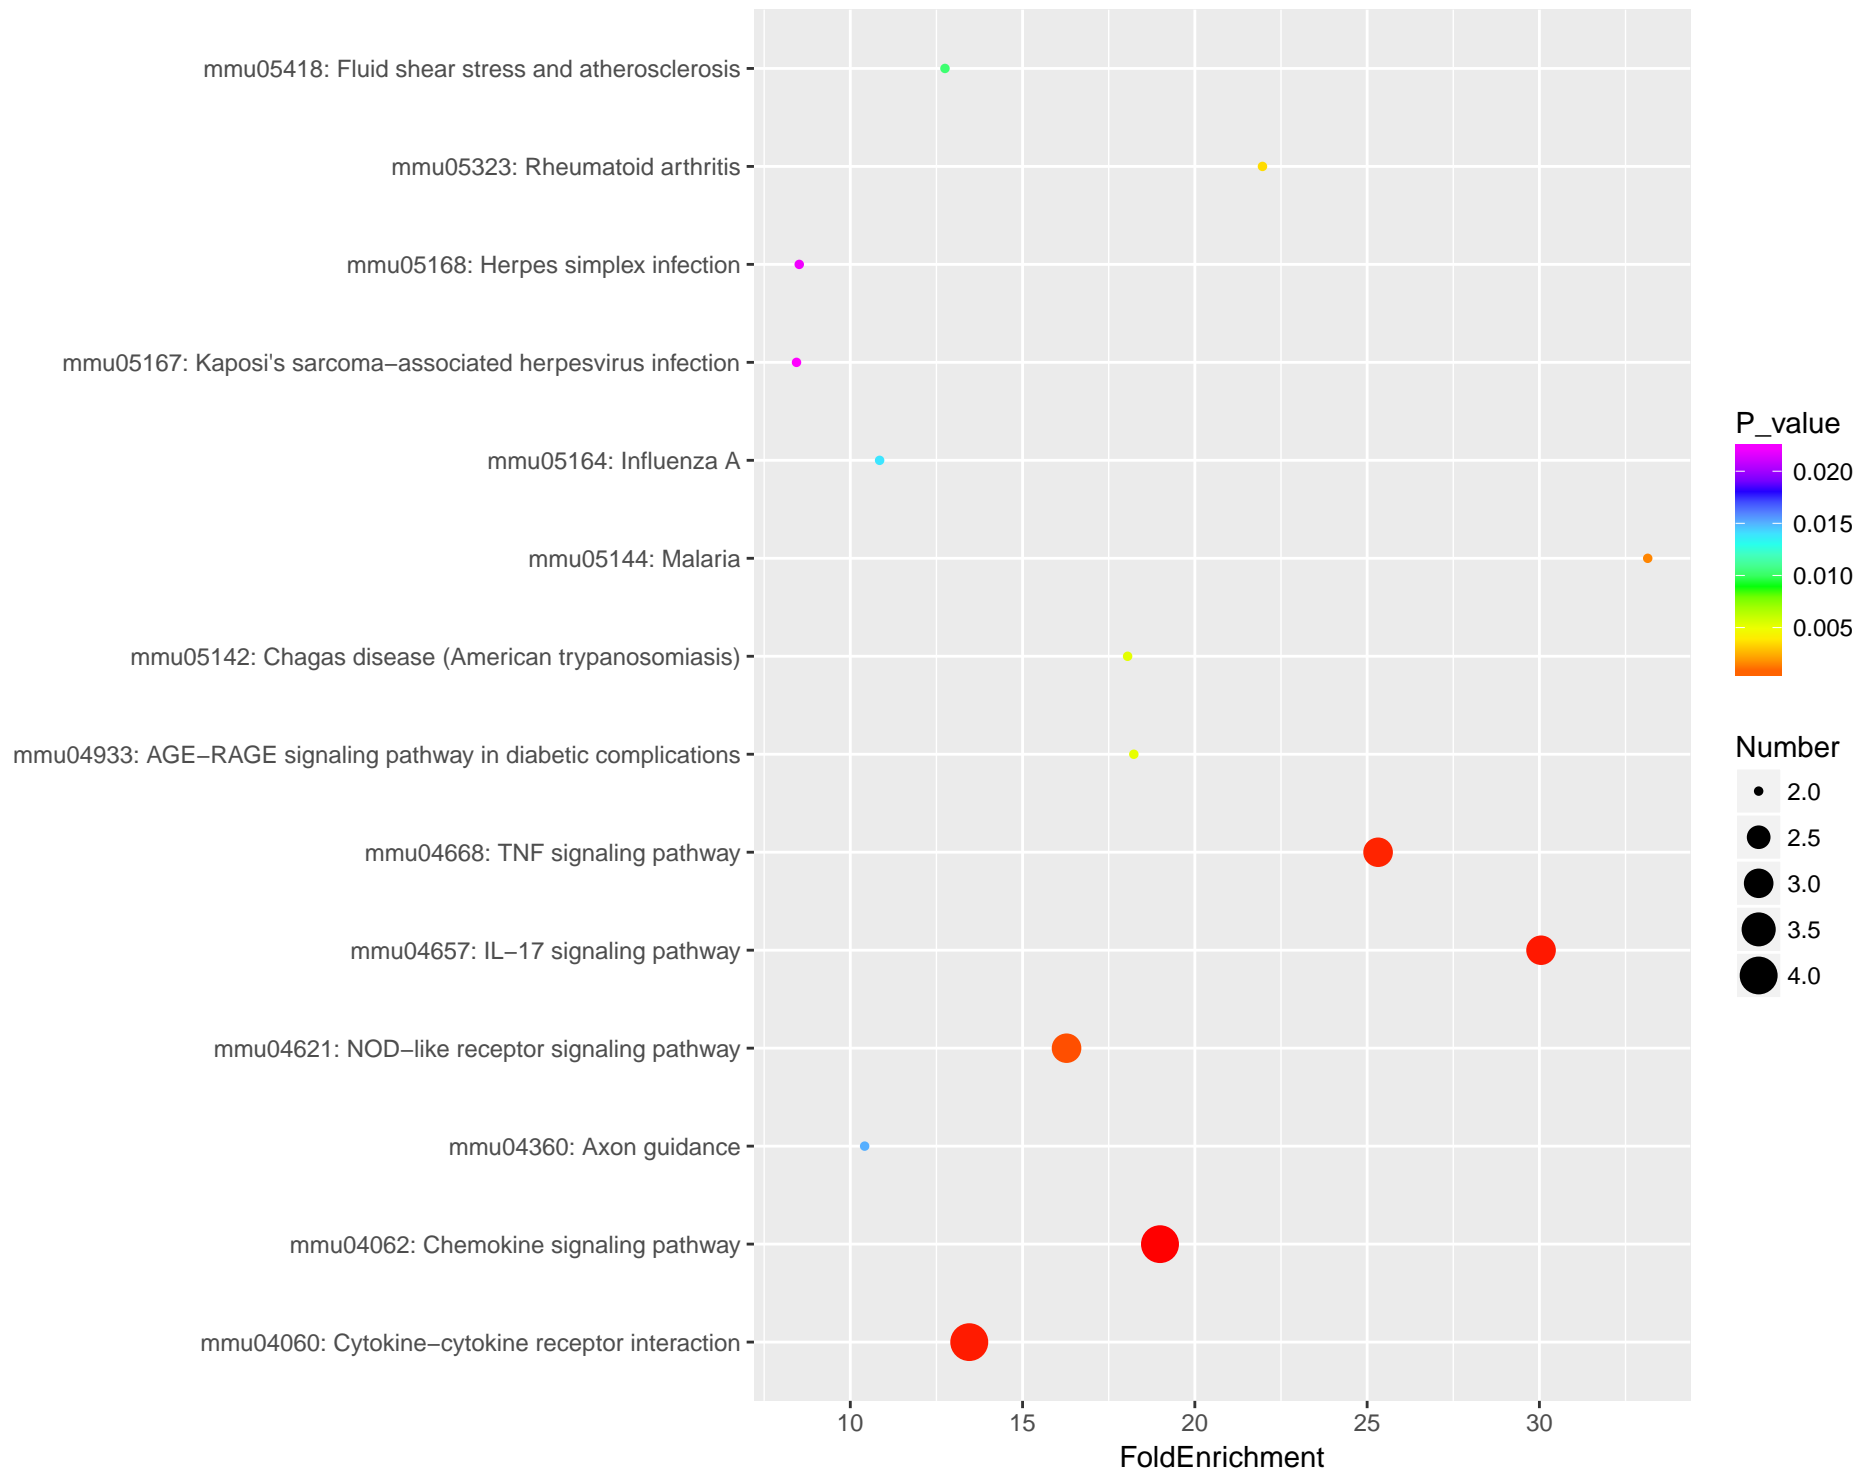

Supplement: Supplementary file 17 [file Supplementary_files.zip]

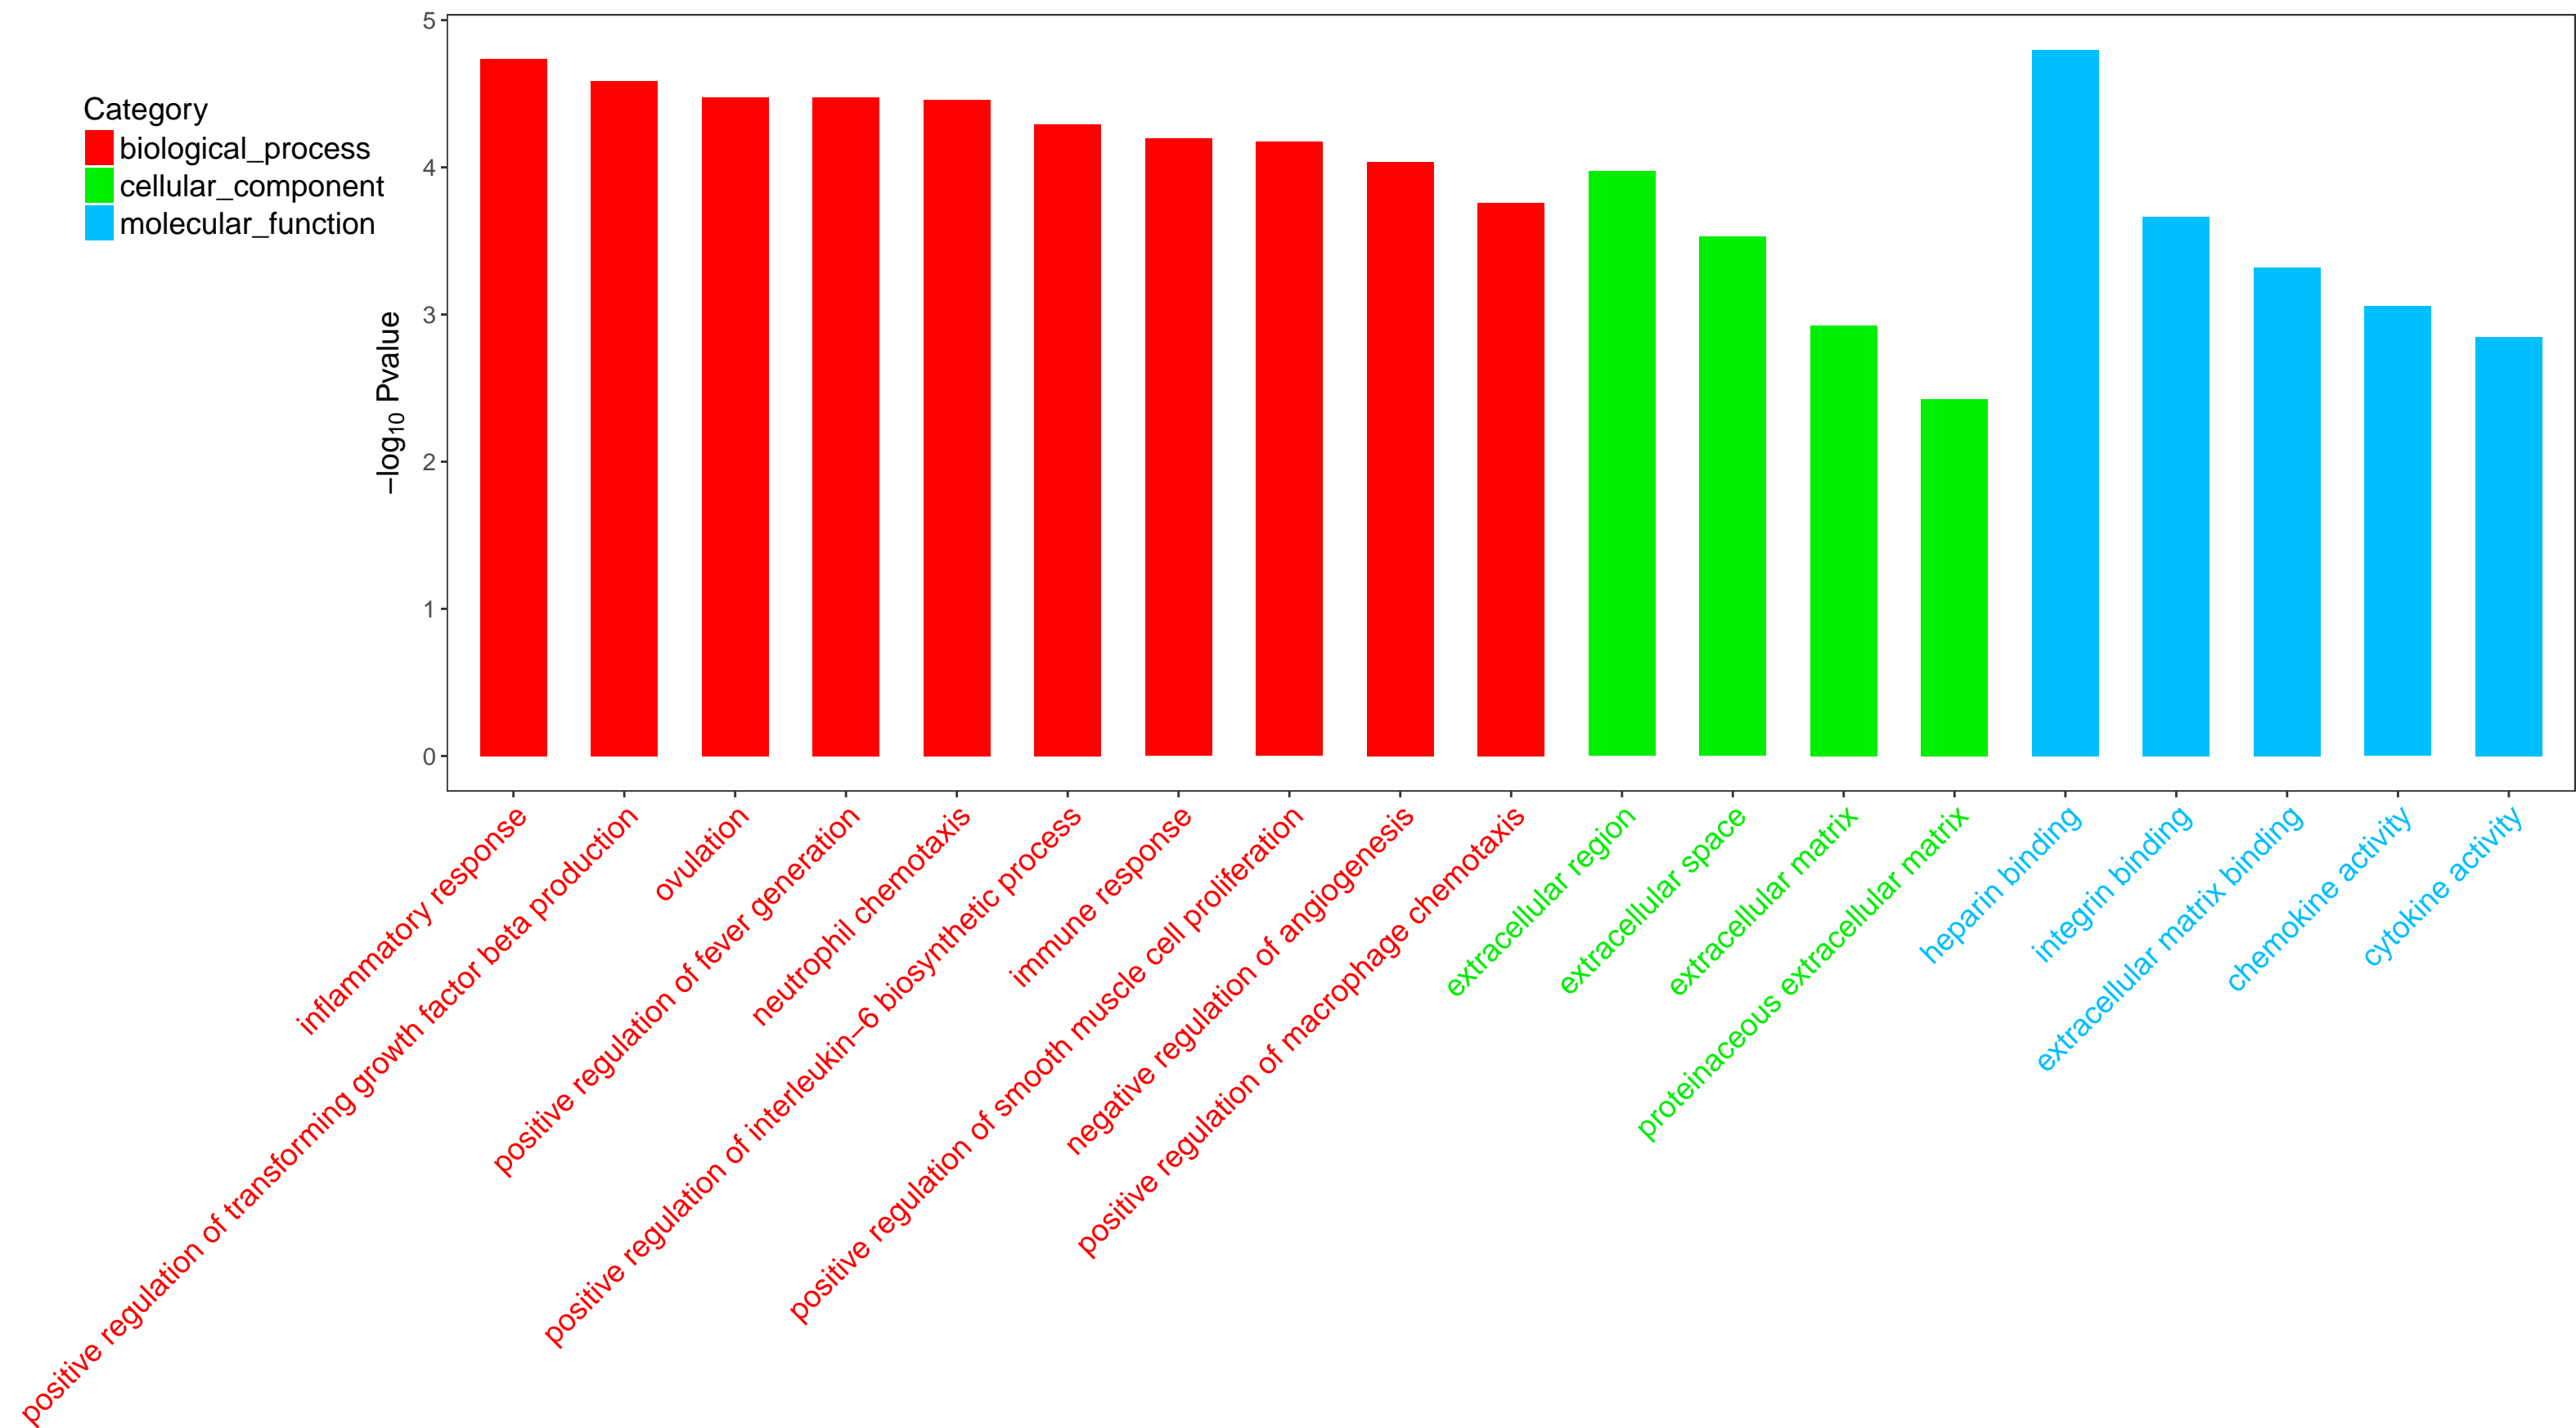

Supplement: Supplementary file 18 [file Supplementary_files.zip]

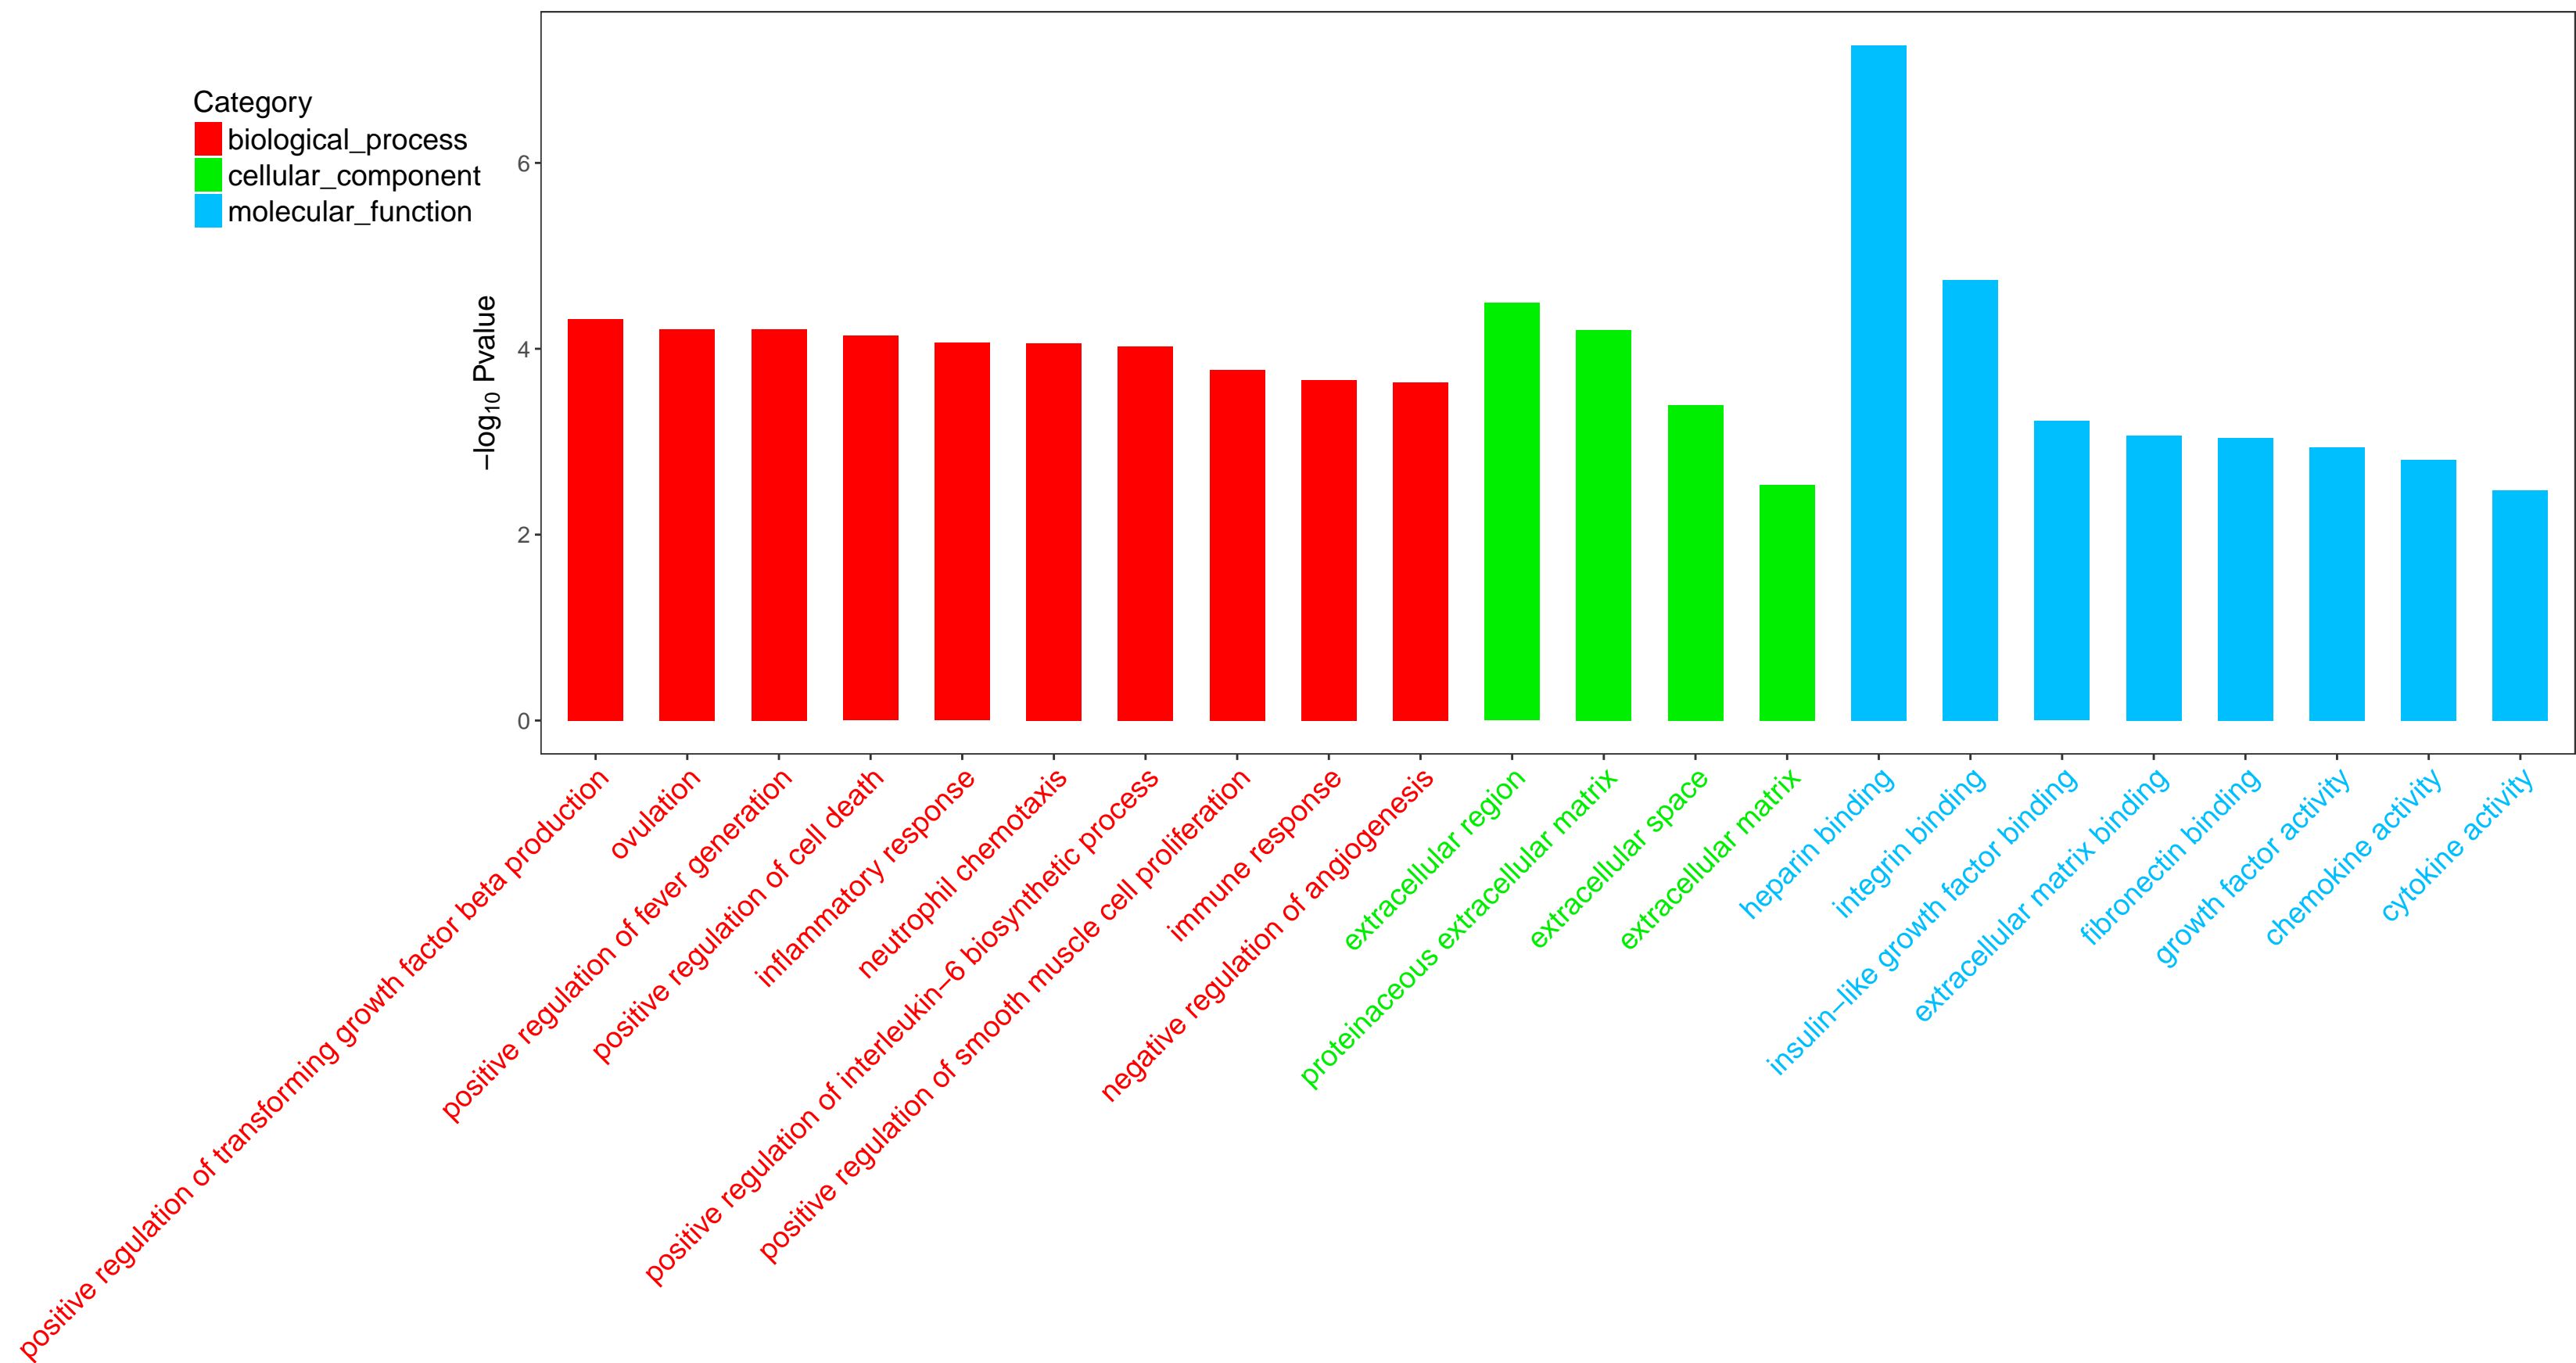

Supplement: Supplementary file 19 [file Supplementary_files.zip]

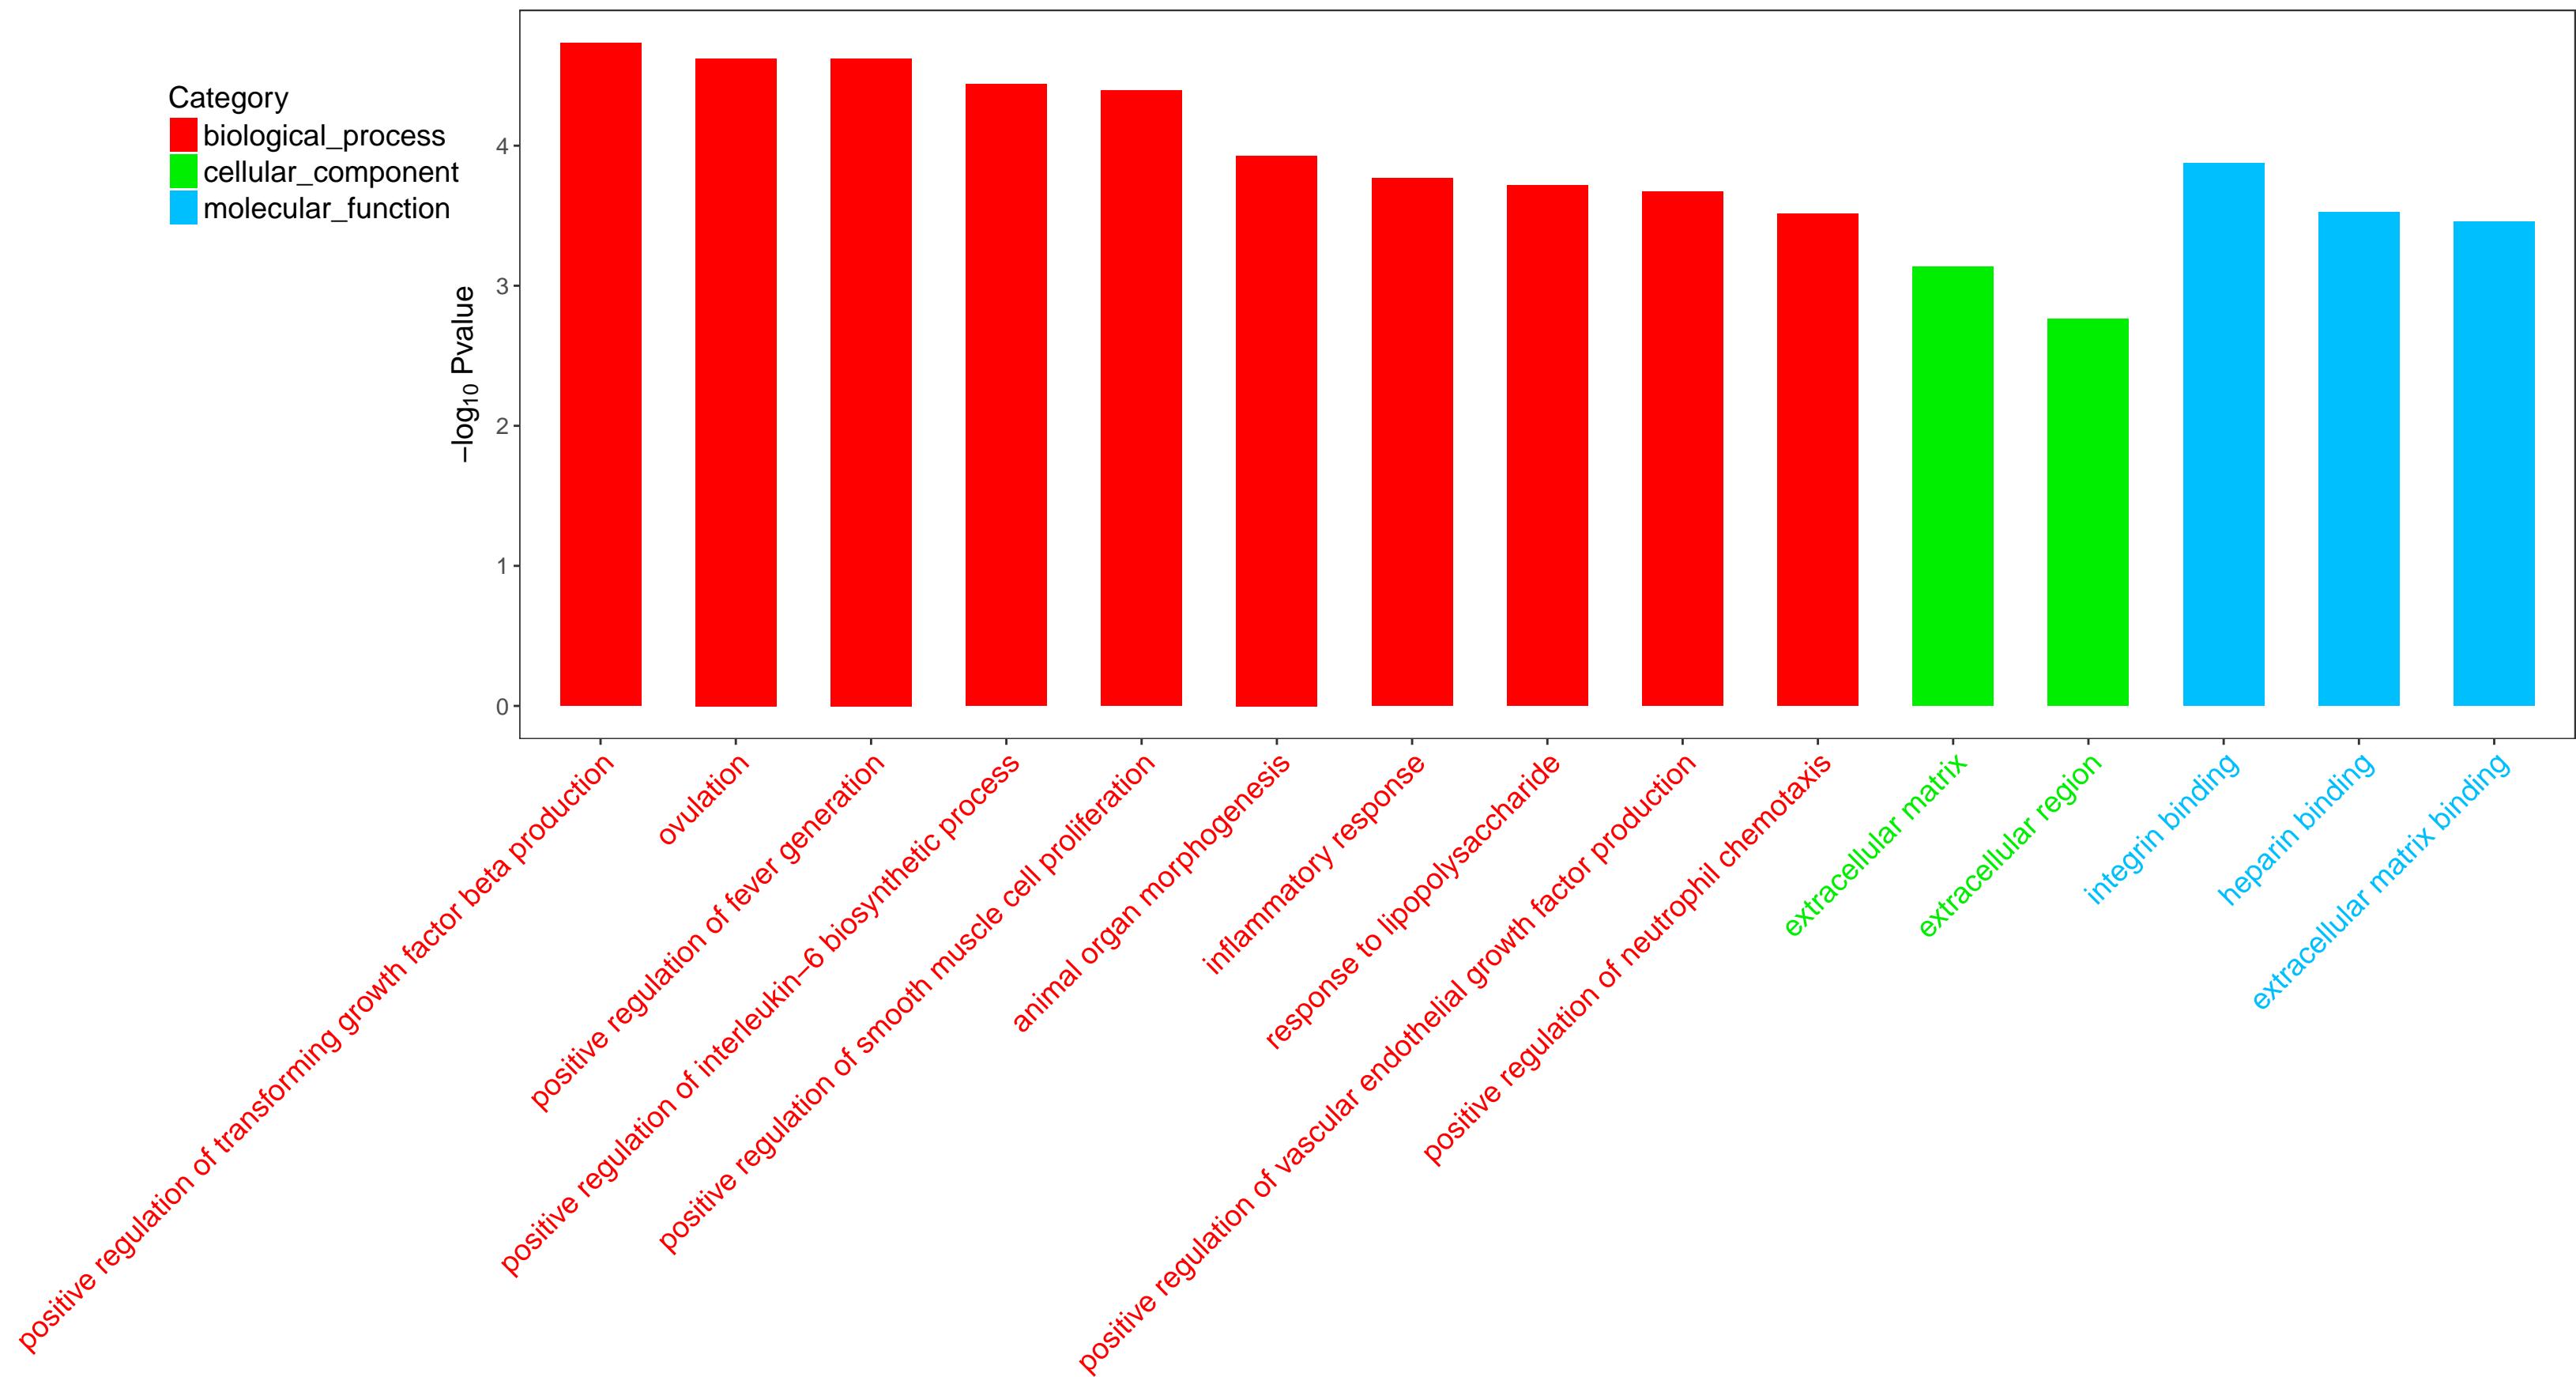

Supplement: Supplementary file 20 [file Supplementary_files.zip]
